# Supplementary material for: Tools for the identification of variable and potentially variable tandem repeats
Source: PubMed Central journal article supplement (PMC1654160; doi:10.1186/1471-2164-7-290), 2006-11-15

| Repeat number | Repeat Start MC58 | Repeat stop MC58 | Denoeud results        | VNTRfinder results     | Differences reported        |                                | Comments/<br>reasons for conflict |
|---------------|-------------------|------------------|------------------------|------------------------|-----------------------------|--------------------------------|-----------------------------------|
|               |                   |                  | Hit start-stop MCZ2491 | Hit start-stop MCZ2491 | Denoeud reported difference | VNTRfinder reported difference |                                   |
| 1             | 23260             | 23284            | 256713-256734          | 253305-253409          | 3                           | 0                              |                                   |
| 2             | 24341             | 24365            | 257316-257493          | 257316-257340          | 153                         | 0                              |                                   |
| 3             | 281145            | 281183           | 2163317-2163596        | 2163558-2163596        | 241                         | 0                              |                                   |
| 4             | 370747            | 370757           | 2074671-2074675        | 2074671-2074681        | 6                           | 0                              |                                   |
| 5             | 370778            | 370800           | 2074628-2074644        | 2074628-2074650        | 6                           | 0                              | (c.f. repeats 7,10)               |
| 6             | 598226            | 598240           | 745362-745376          | 745363-745376          | 0                           | 1                              |                                   |
| 7             | 613994            | 614016           | 2074628-2074644        | 2074628-2074650        | 6                           | 0                              | (c.f. repeats 5,10)               |
| 8             | 794146            | 794168           | 941942-941963          | 941942-941964          | 1                           | 0                              |                                   |
| 9             | 1340997           | 1341015          | 1432907-1432940        | 1432907-1432925        | 15                          | 0                              |                                   |
| 10            | 1443509           | 1443531          | 2074628-207644         | 2074628-2074650        | 6                           | 0                              | (c.f. repeats 5,7)                |
| 11            | 1452043           | 1452078          | 1535314-1535353        | 1535314-1535349        | 4                           | 0                              |                                   |
| 12            | 1487085           | 1487267          | 1573652-1573834        | 1573215-1573400        | 0                           | 3                              |                                   |
| 13            | 1527328           | 1527375          | 1612372-1612414        | 1612372-1612419        | 5                           | 0                              |                                   |
| 14            | 1604964           | 1605008          | 1741676-1741702        | 1741676-1741720        | 18                          | 0                              | (c.f. repeat 15)                  |
| 15            | 1694228           | 1694275          | 1741676-1741705        | 1741676-1741723        | 18                          | 0                              | (c.f. repeat 14)                  |
| 16            | 1822610           | 1822663          | 1934569-1934756        | 1934569-1934622        | 134                         | 0                              |                                   |
| 17            | 1975357           | 1975387          | 558555-558771          | 558555-558585          | 186                         | 0                              |                                   |
| 18            | 1985578           | 1985598          | 547879-547871          | 547859-547879          | 12                          | 0                              |                                   |

 Reported indel does not appear to lie in tandem repeat array
  Very poorly aligned region
  Problematic region – arises more than once as a hit

 Indel at start of flanking region/end of repeat array
  Both methods hit different and/or difficult to align regions

1. For each repeat, the first plot represents a plot of the repeat and 300nt left and right flanks for the repeat from MC58 (x-axis) versus the hit plus 300nt flanks from Z2491 (y-axis)
2. Repeat regions are highlighted by a box

**Repeat start-stop: 23260-23284**  
**Unit: GTC**  
**Tandem array: GTTGTCGGCGGCGACGGTGTCGTCG**  
**Denoeud report variant of 3**  
**VNTRfinder report variant of 0**

Denoeud: 23260-23284 (MC58) versus 256713-256734 (Z2491)

MC58, repeat at 23260-23284 +/- 300nt flanks

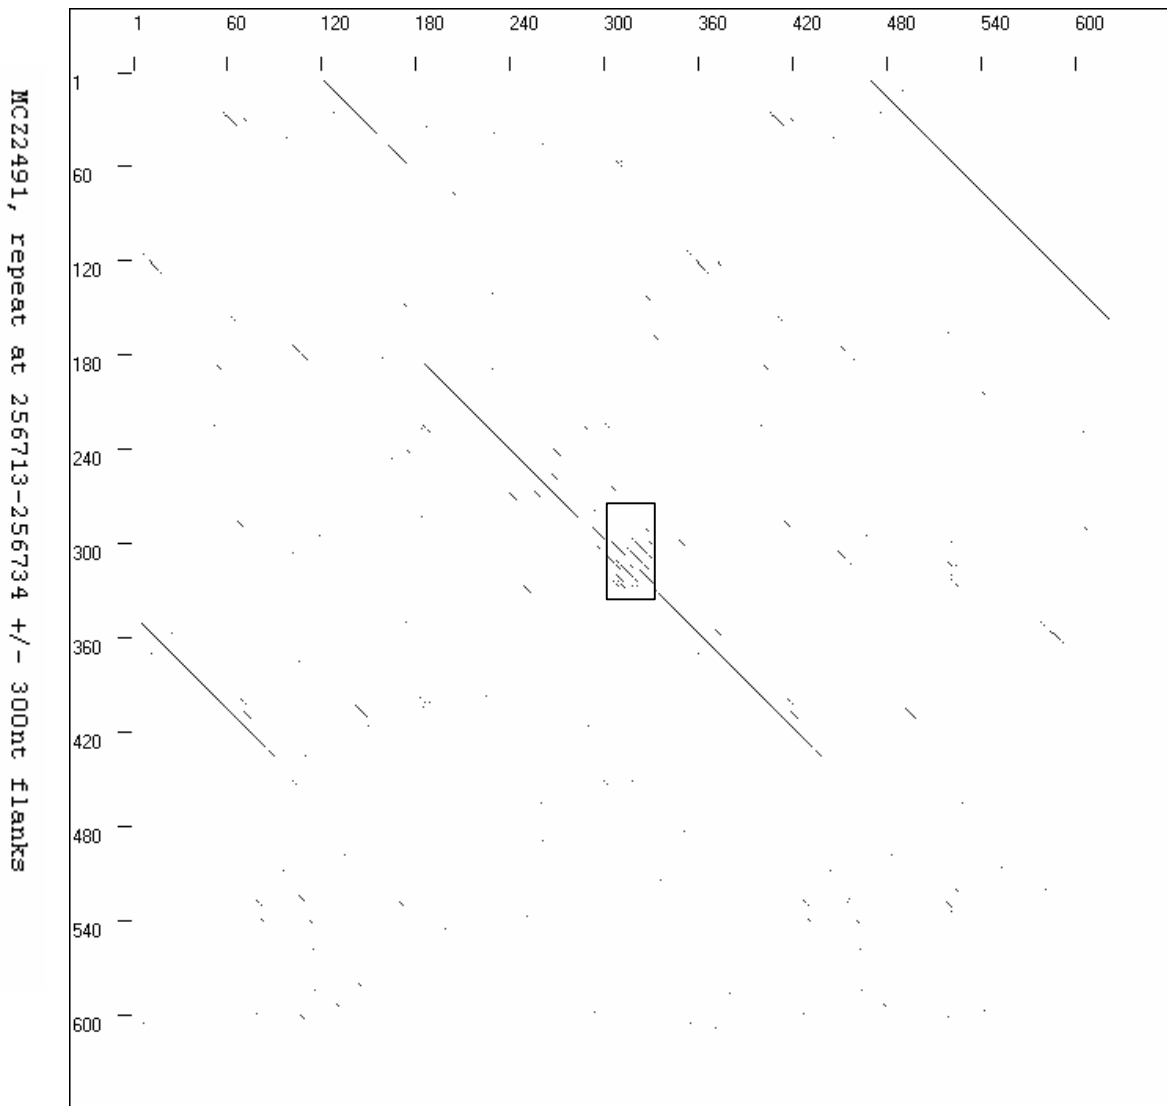

VNTRfinder: 23260-23284 253305-253409

MC58, repeat at 23260-23284 +/- 300nt flanks

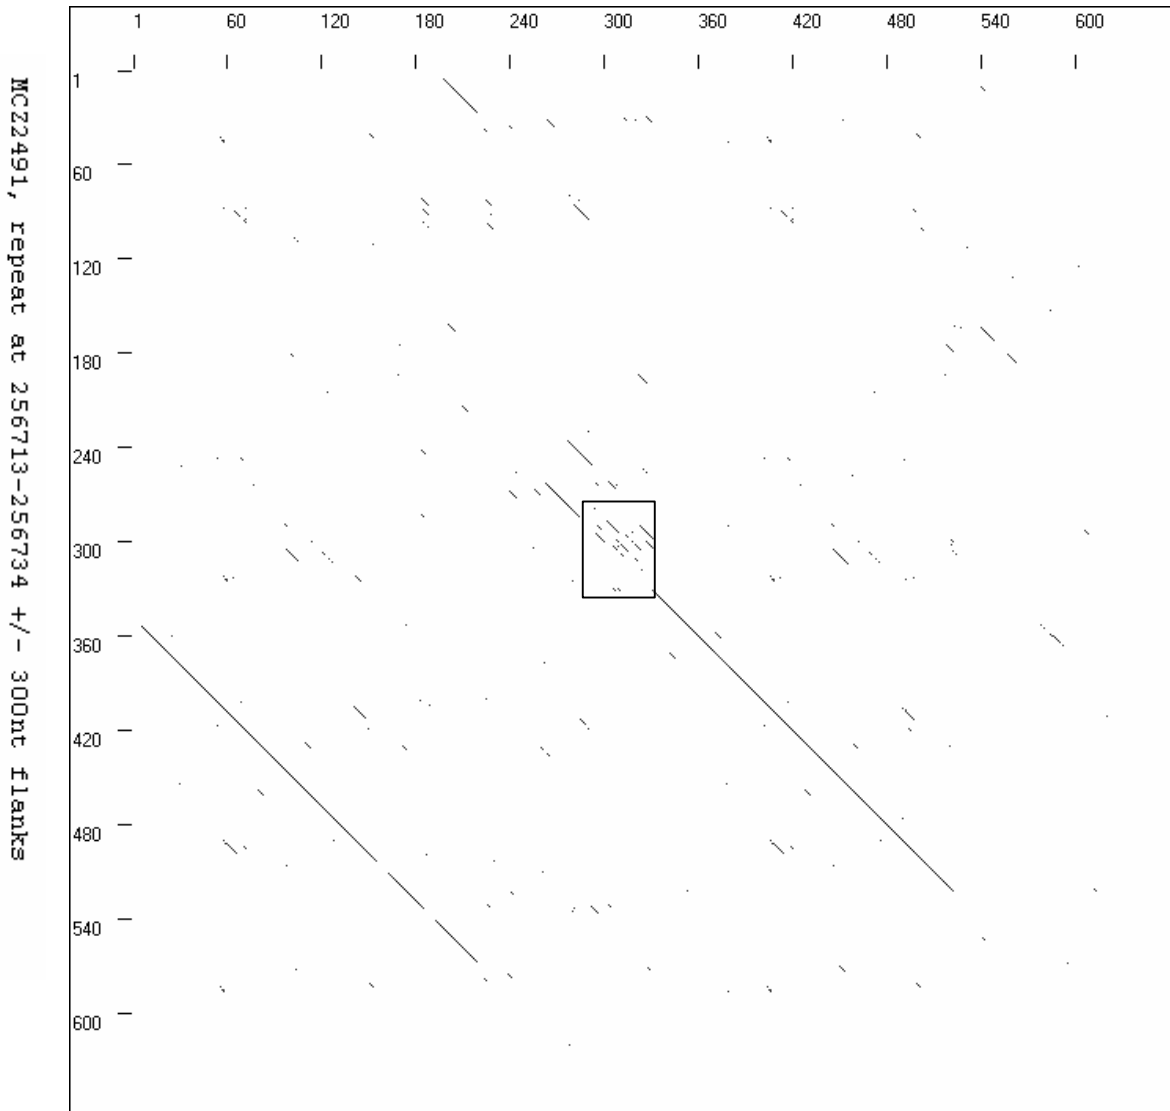

**Repeat start-stop: 24341-24365**  
**Unit: TGTT**  
**Tandem array: TGTTTGTTTGACTGTTTTATTTTT**  
**Denoeud report variant of 153**  
**VNTRfinder report variant of 0**

Denoeud: 24341-24365 versus 257316-257493

MC58, repeat at 23260-23284 +/- 300nt flanks

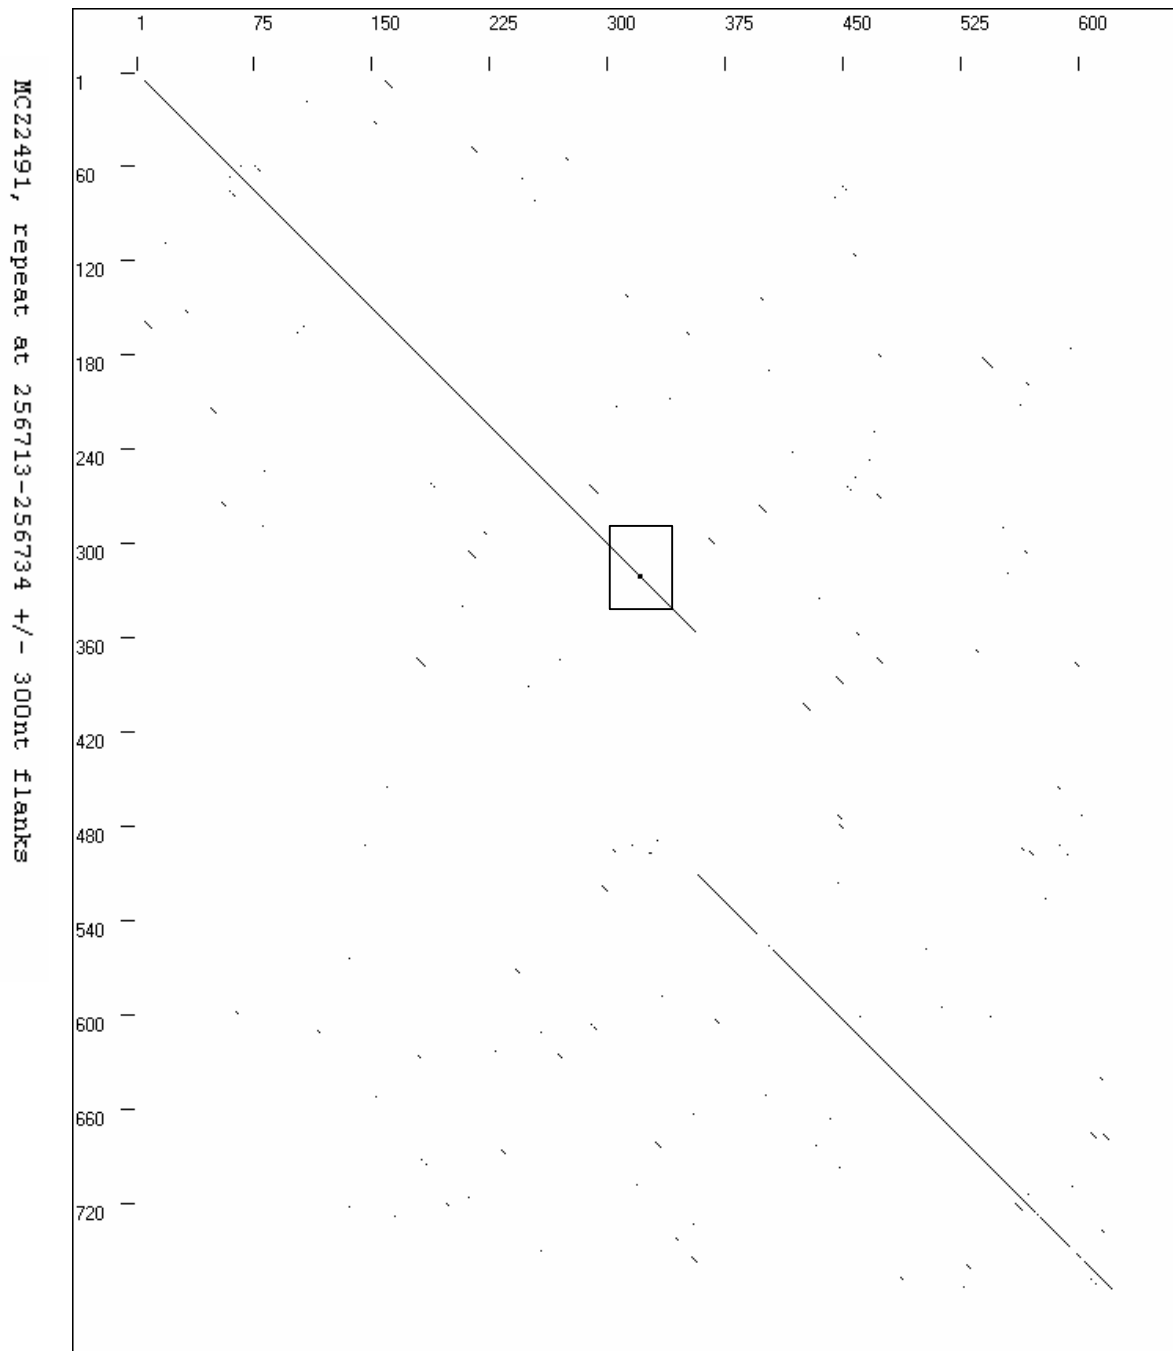

VNTRfinder: 24341-24365 257316-257340

MC58, repeat at 23260-23284 +/- 300nt flanks

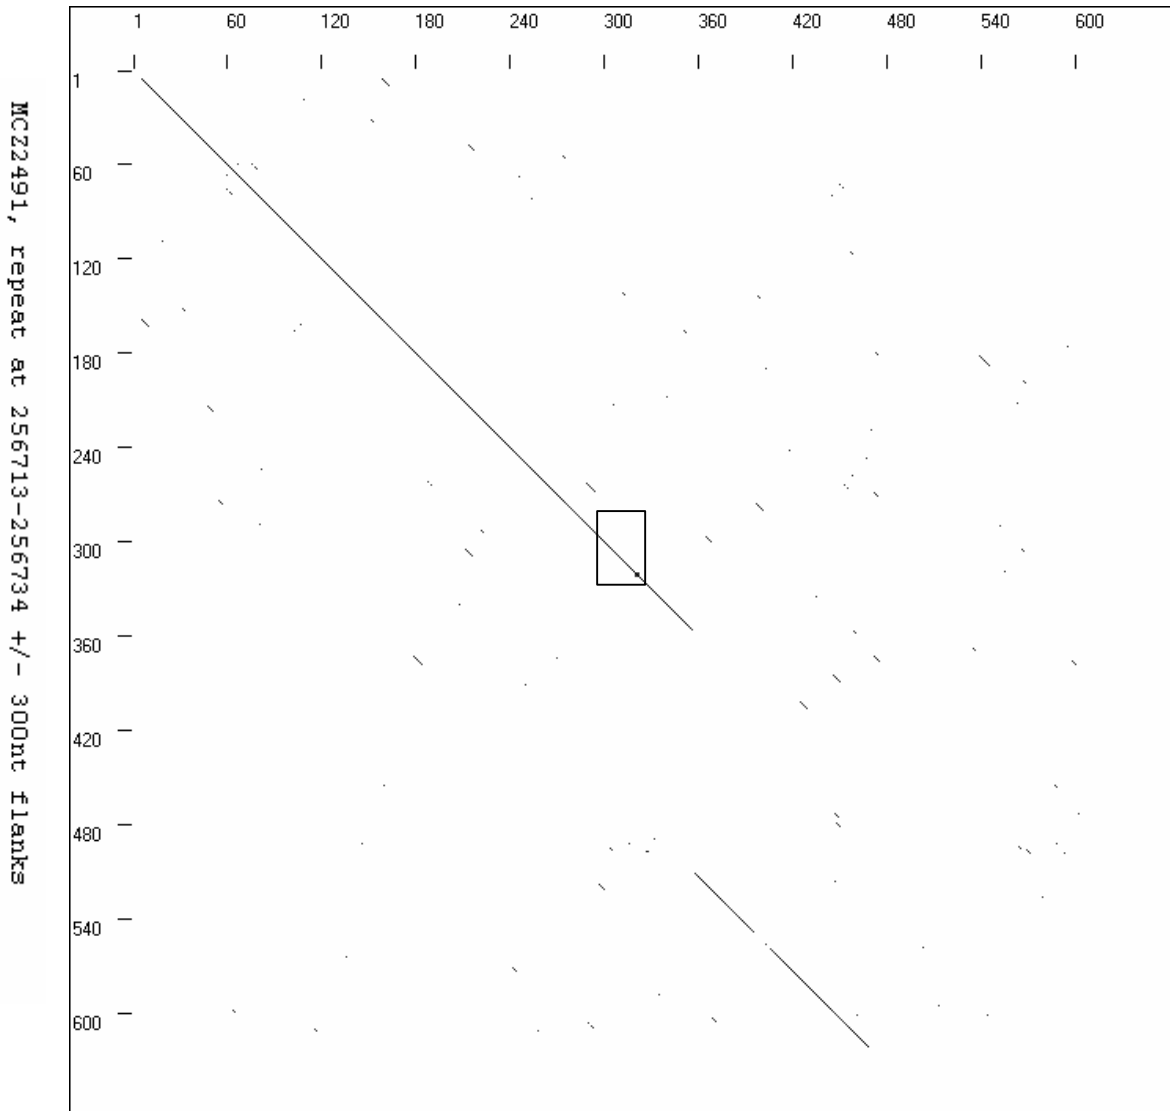

**Repeat start-stop: 281145-281183**  
**Unit: CCGCGCAATGC**  
**Tandem array: CCGTCGCCATACCCGCGCCGAATGCCGCGCAATGACCG**  
**Denoeud report variant of 241**  
**VNTRfinder report variant of 0**

Denoeud: 281145-281183 versus 2163596-2163317

MC58, repeat at 23260-23284 +/- 300nt flanks

MC22491, repeat at 256713-256734 +/- 300nt flanks

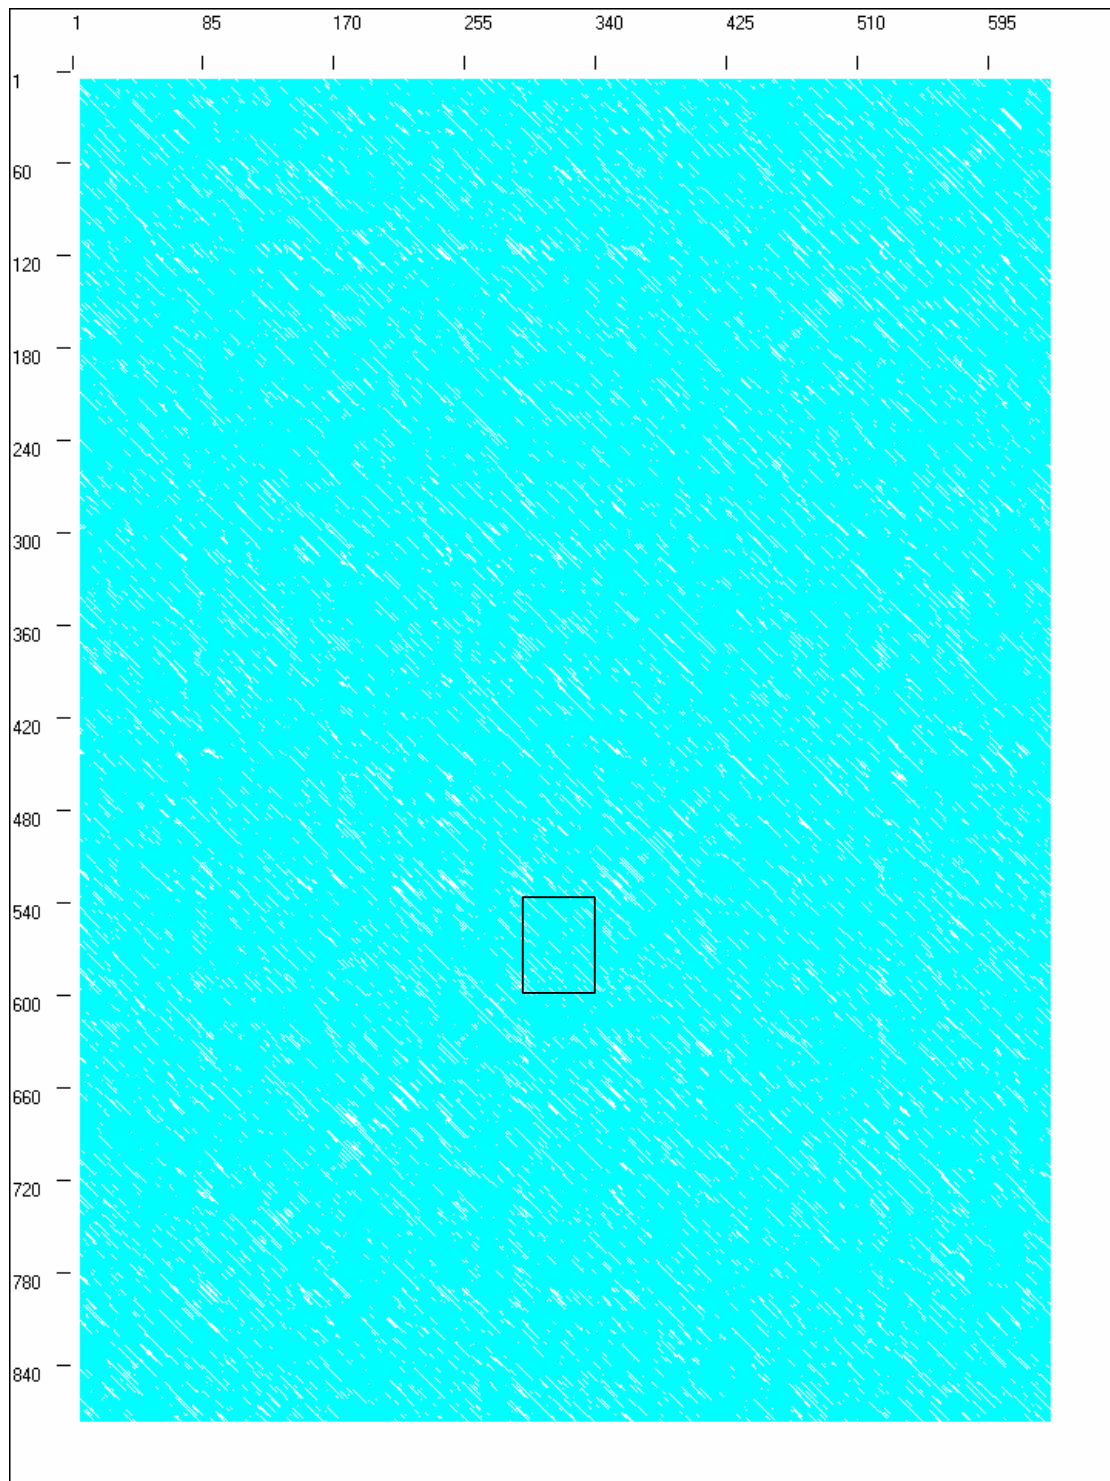

VNTRfinder: 281145-281183

2163558-2163596

MC58, repeat at 23260-23284 +/- 300nt flanks

MC22491, repeat at 256713-256734 +/- 300nt flanks

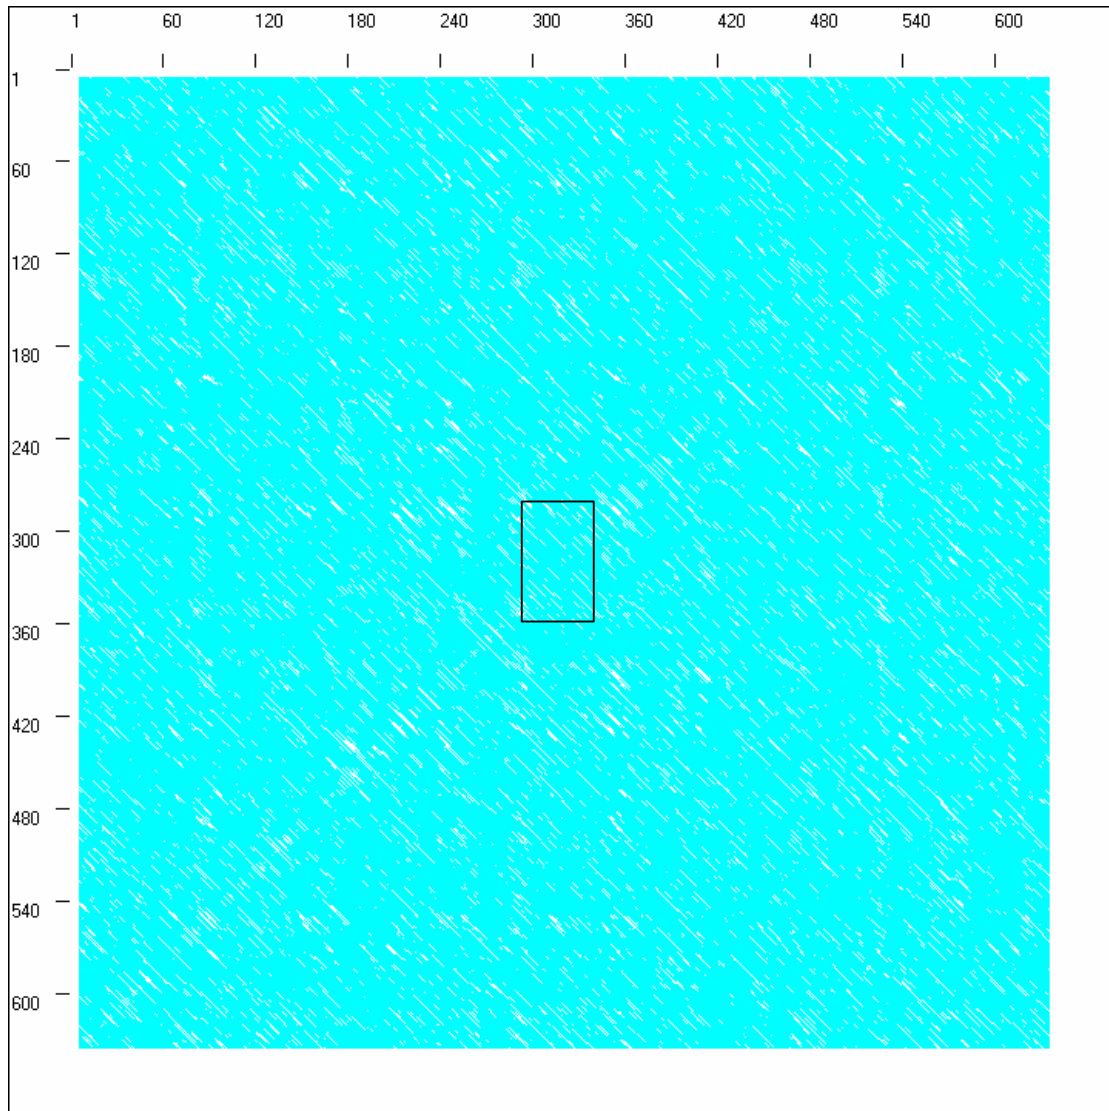

**Repeat start-stop: 370747-370757**  
**Unit: ACGGT**  
**Tandem array: ACGGTACGGTA**  
**Denoeud report variant of 6**  
**VNTRfinder report variant of 0**

Denoeud: 370747-370757 versus 2074675-2074671

MC58, repeat at 23260-23284 +/- 300nt flanks

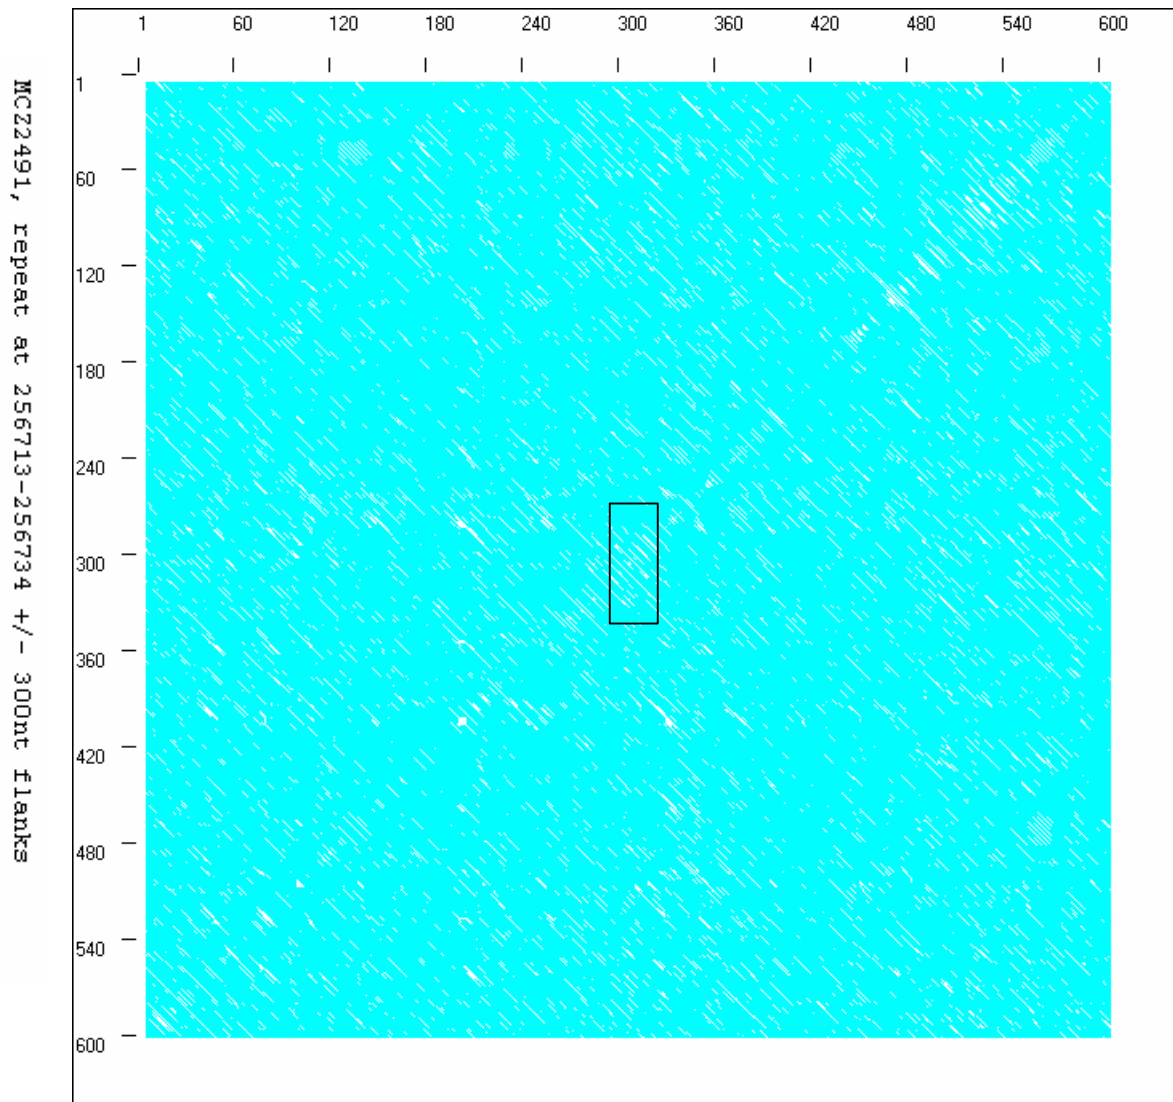

VNTRfinder: 370747-370757

2074671-2074681



MC58, repeat at 23260-23284 +/- 300nt flanks

MC22491, repeat at 256713-256734 +/- 300nt flanks

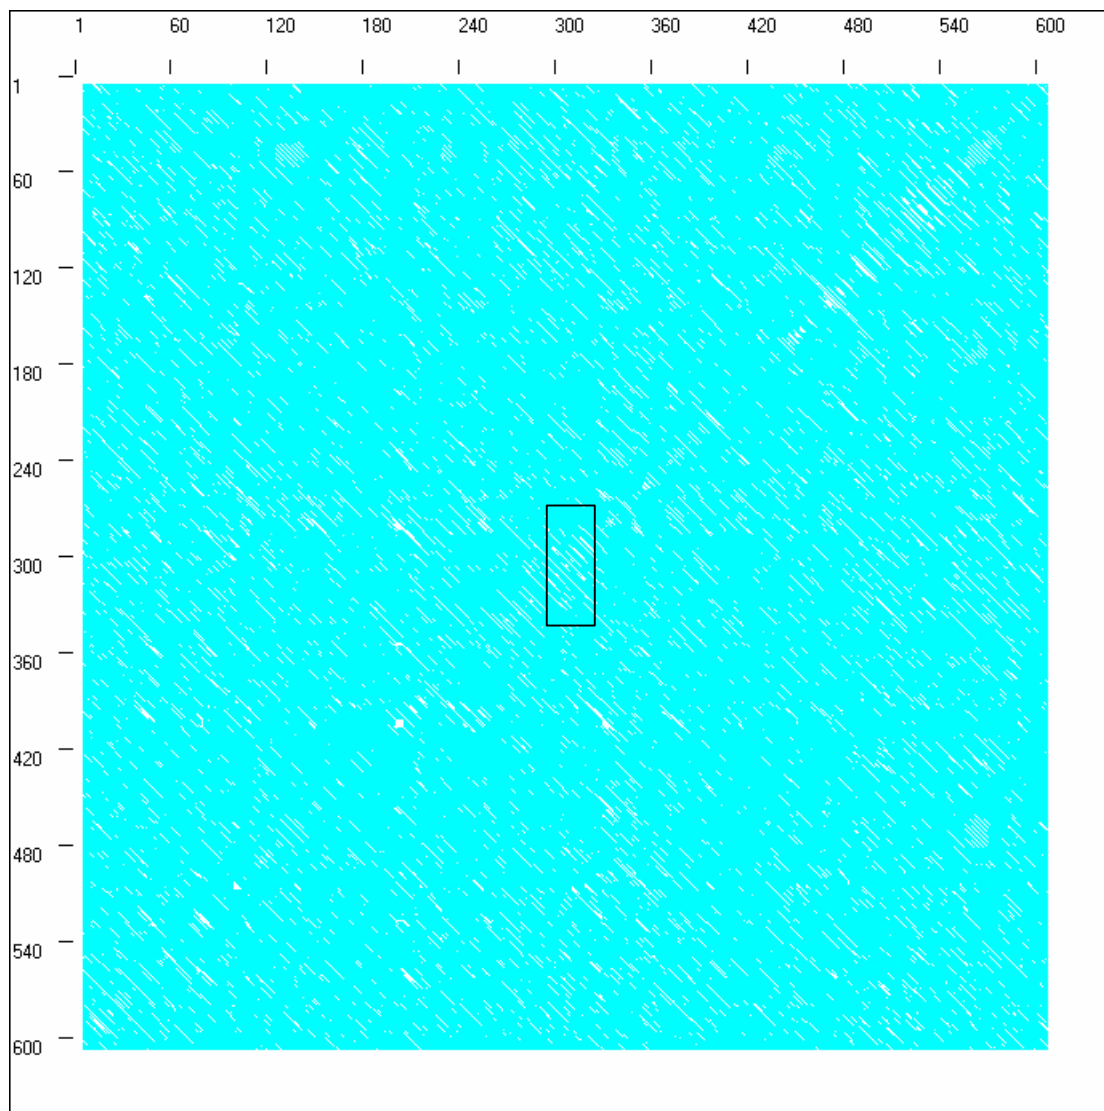

**Repeat start-stop: 370778-370800**  
**Unit: AGC**  
**Tandem array: AGCAGCAGCTCACACAGCAGGAG**  
**Denoeud report variant of 6**  
**VNTRfinder report variant of 0**

Denoeud: 370778-370800 versus 2074644-2074628

MC58, repeat at 23260-23284 +/- 300nt flanks

MC22491, repeat at 256713-256734 +/- 300nt flanks

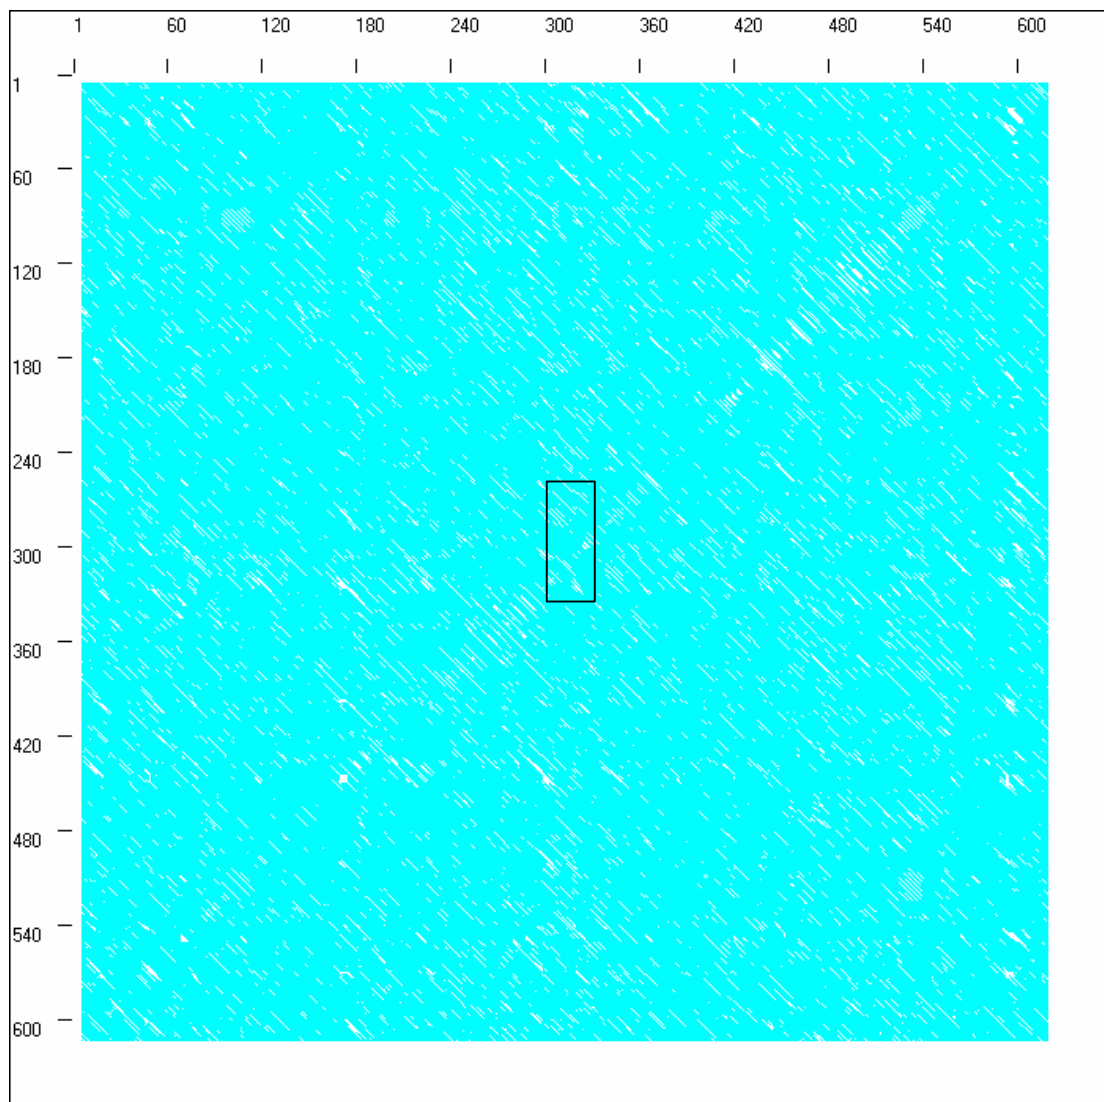

VNTRfinder: 370778-370800

2074628-2074650

MC58, repeat at 23260-23284 +/- 300nt flanks

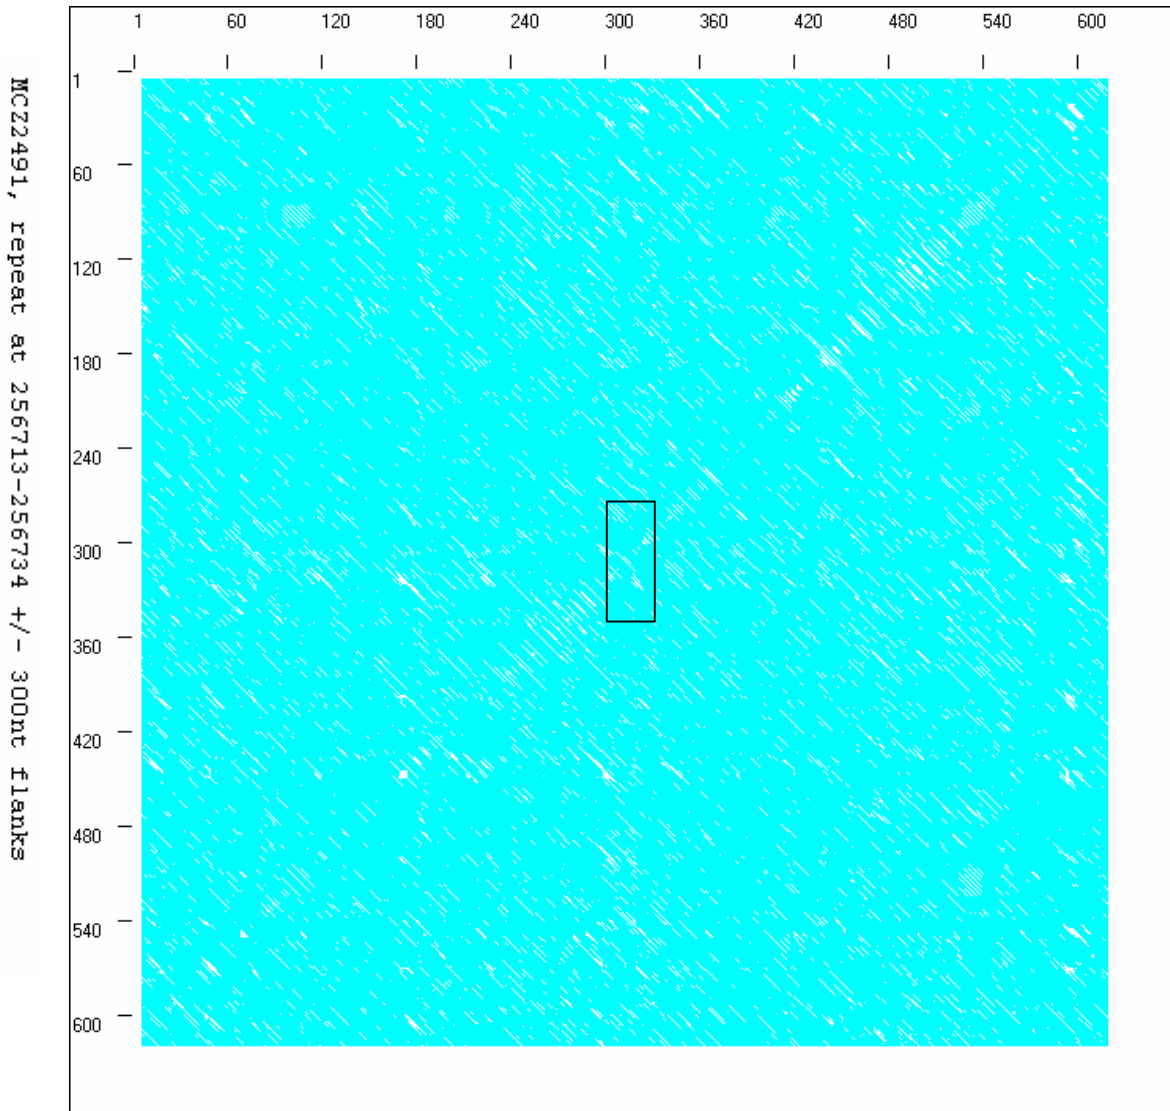

**Repeat start-stop: 598226-598240**  
**Unit: GATTT**  
**Tandem array: GATATTGATTTGATT**  
**Denoeud report variant of 0**  
**VNTRfinder report variant of 1**

Denoeud: 598226-598240 versus 745362-745376

MC58, repeat at 23260-23284 +/- 300nt flanks

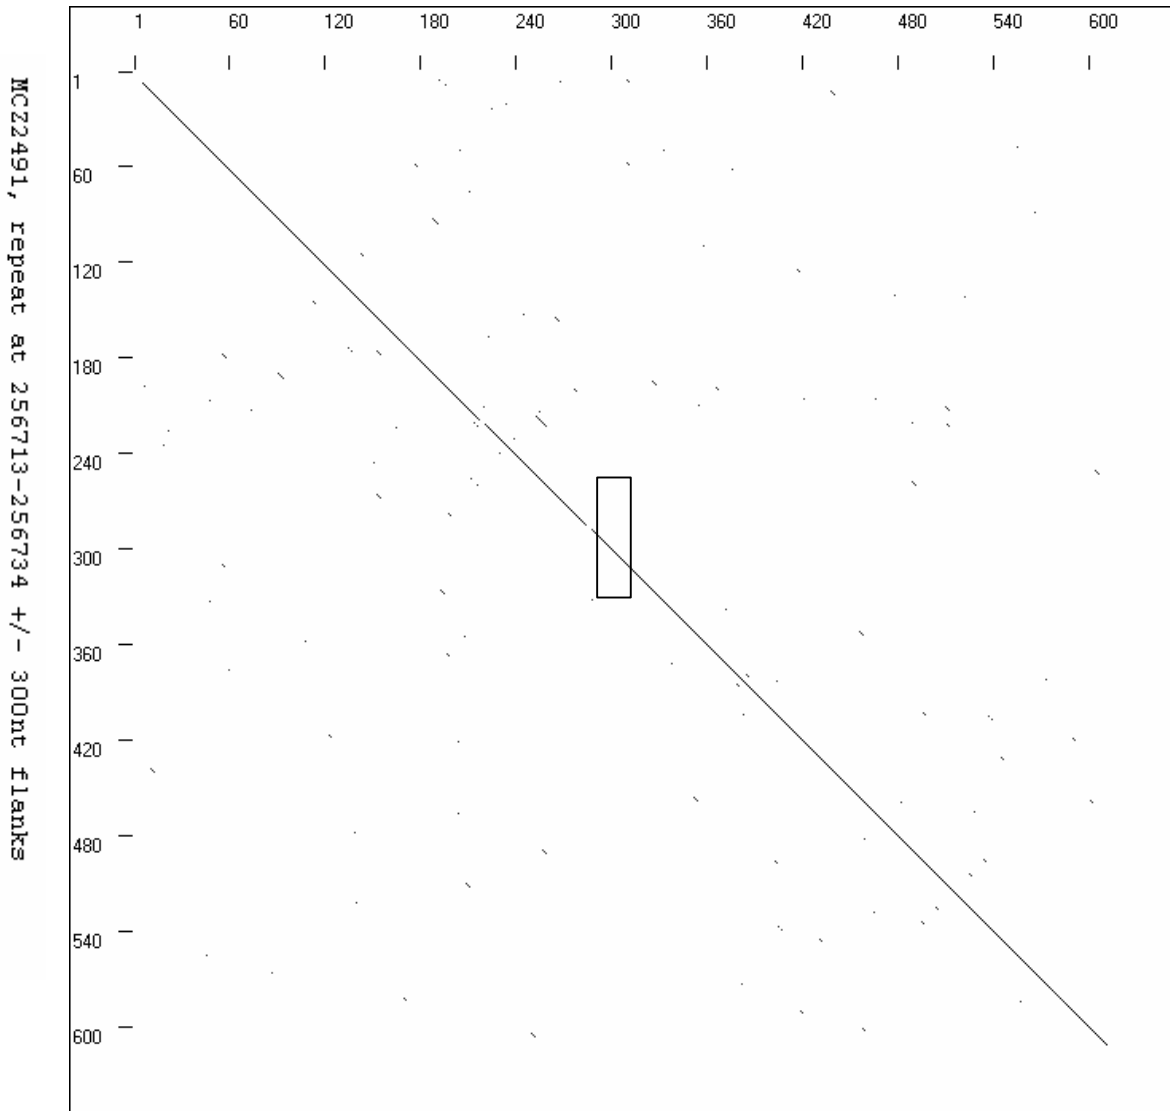

VNTRfinder: 598226-598240

745363-745376

MC58, repeat at 23260-23284 +/- 300nt flanks

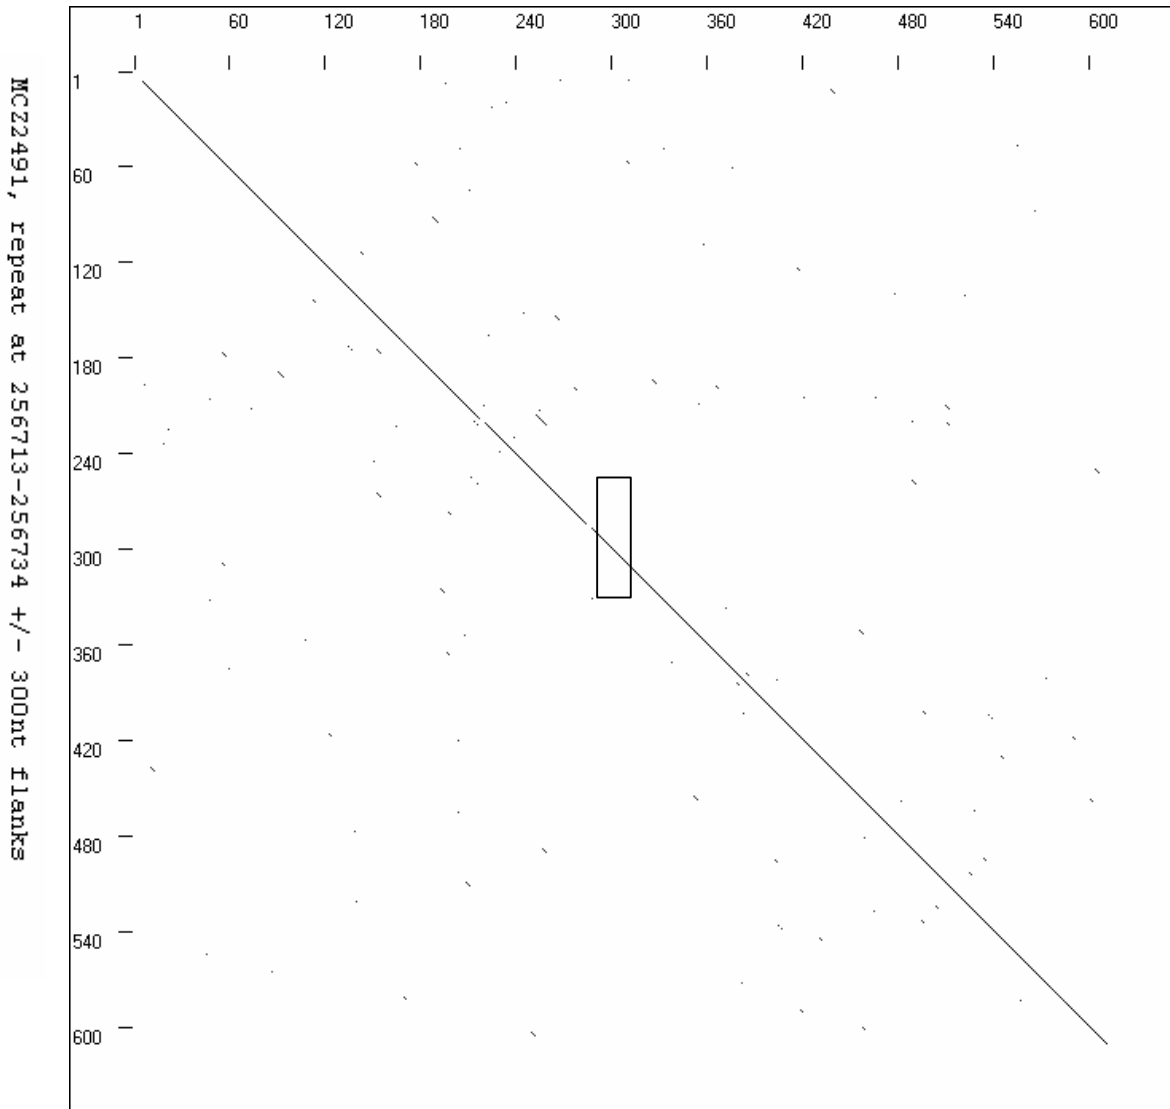

**Repeat start-stop: 613994-614016**  
**Unit: AGC**  
**Tandem array: AGCAGCAGCTCACACAGCAGGAG**  
**Denoeud report variant of 6**  
**VNTRfinder report variant of 0**

Denoeud: 613994-614016 2074644-2074628

MC58, repeat at 23260-23284 +/- 300nt flanks

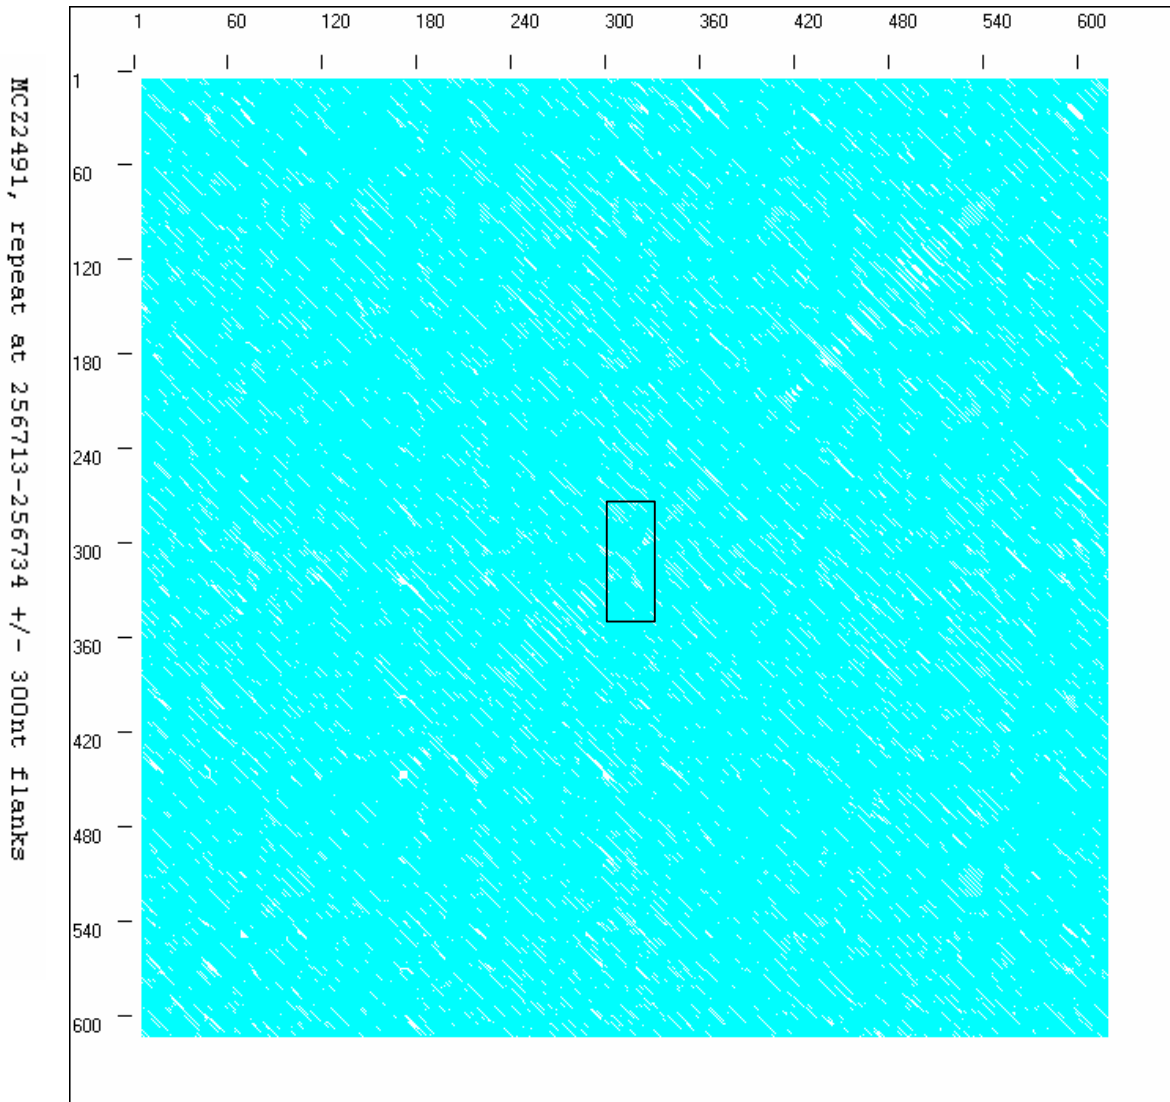

VNTRfinder: 613994-614016

2074628-2074650

MC58, repeat at 23260-23284 +/- 300nt flanks

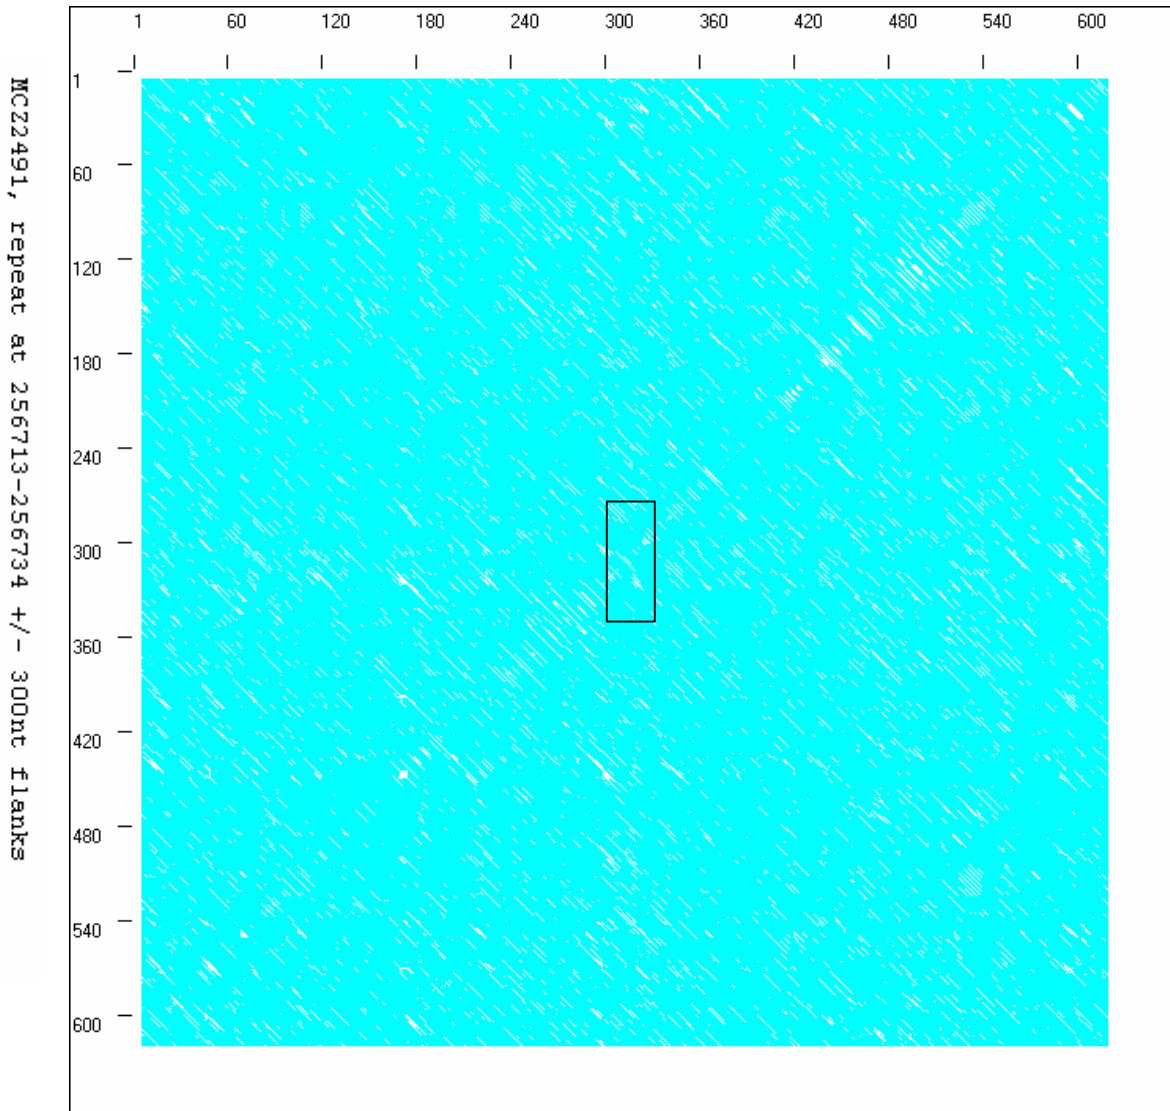

**Repeat start-stop: 794146-794168**

**Unit: CATTGTTGTT**

**Tandem array: CATTGTTTCATTGTTGTTTCCTT**

**Denoeud report variant of 1**

**VNTRfinder report variant of 0**

Denoeud: 794146-794168 941942-941963

MC58, repeat at 23260-23284 +/- 300nt flanks

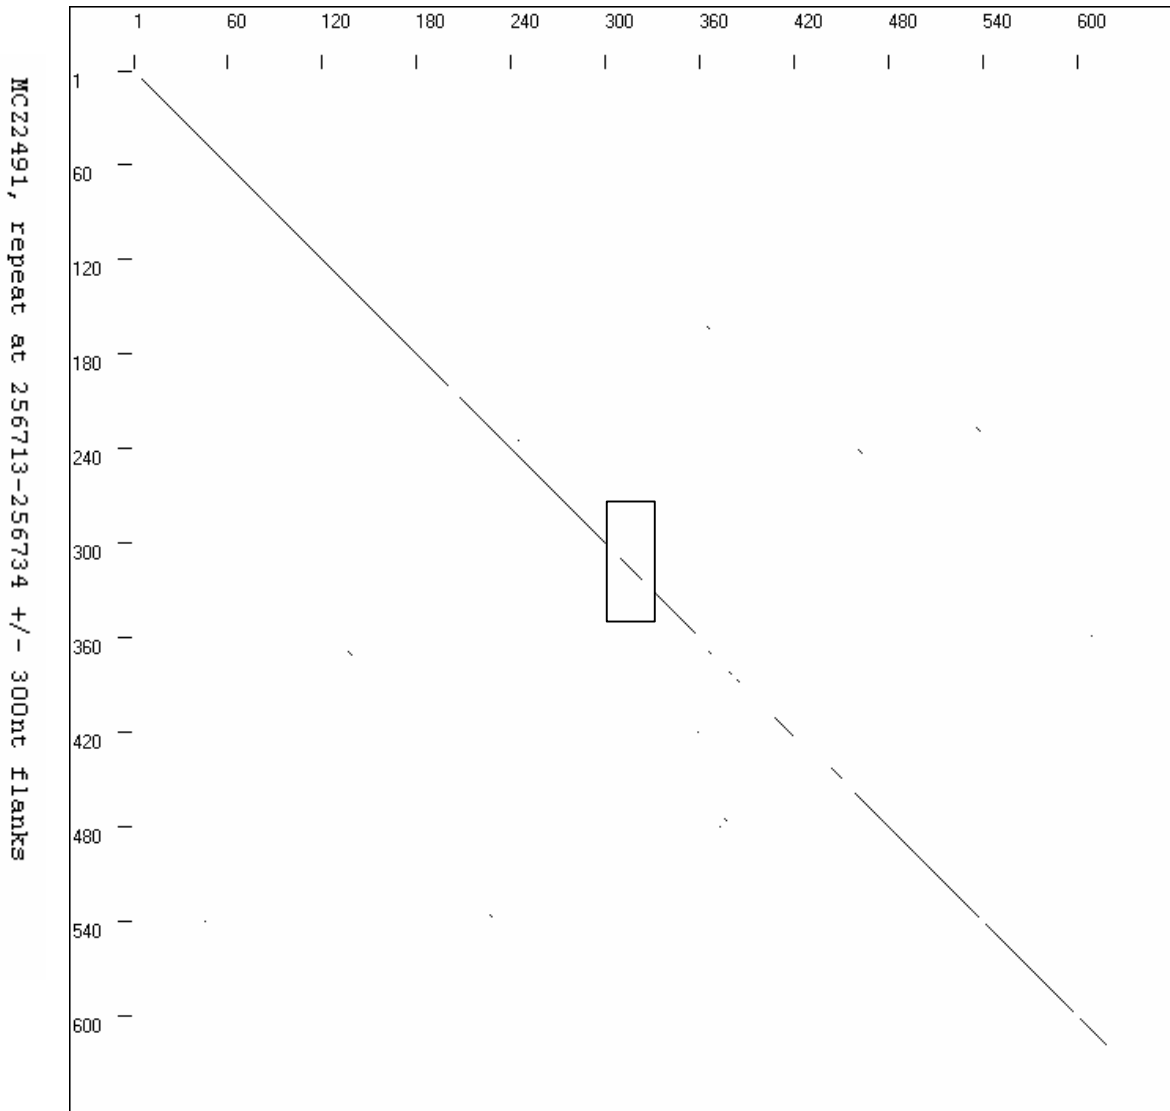

VNTRfinder: 794146-794168

941942-941964



MC58, repeat at 23260-23284 +/- 300nt flanks

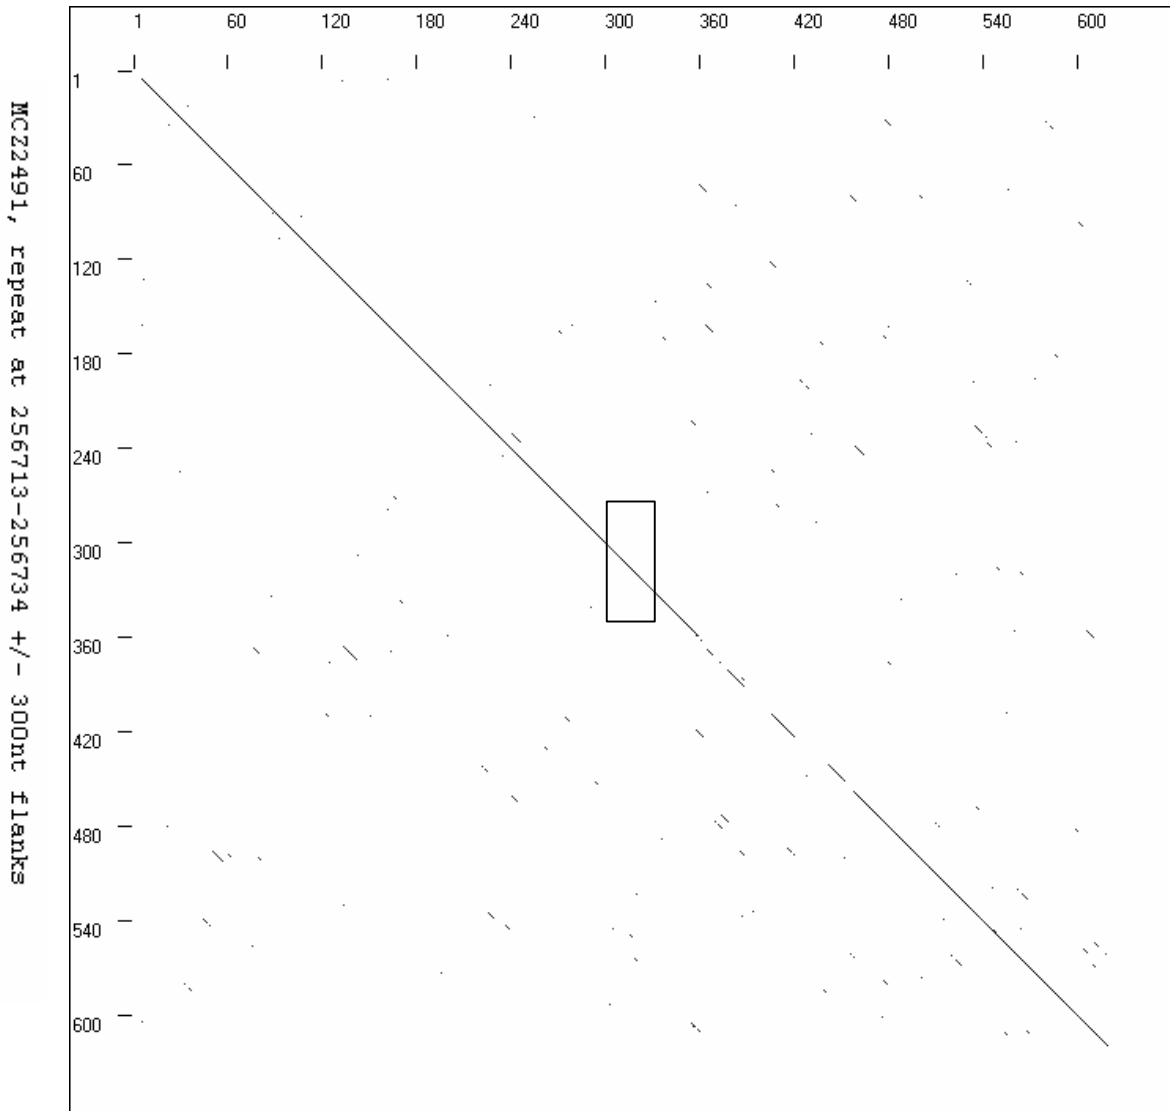

**Repeat start-stop: 1340997-1341015**  
**Unit: TGGCGGCTG**  
**Tandem array: TGGCGGCTGTGGCTGCTGT**  
**Denoeud report variant of 15**  
**VNTRfinder report variant of 0**

Denoeud: 1340997-1341015

1432907-1432940

MC58, repeat at 23260-23284 +/- 300nt flanks

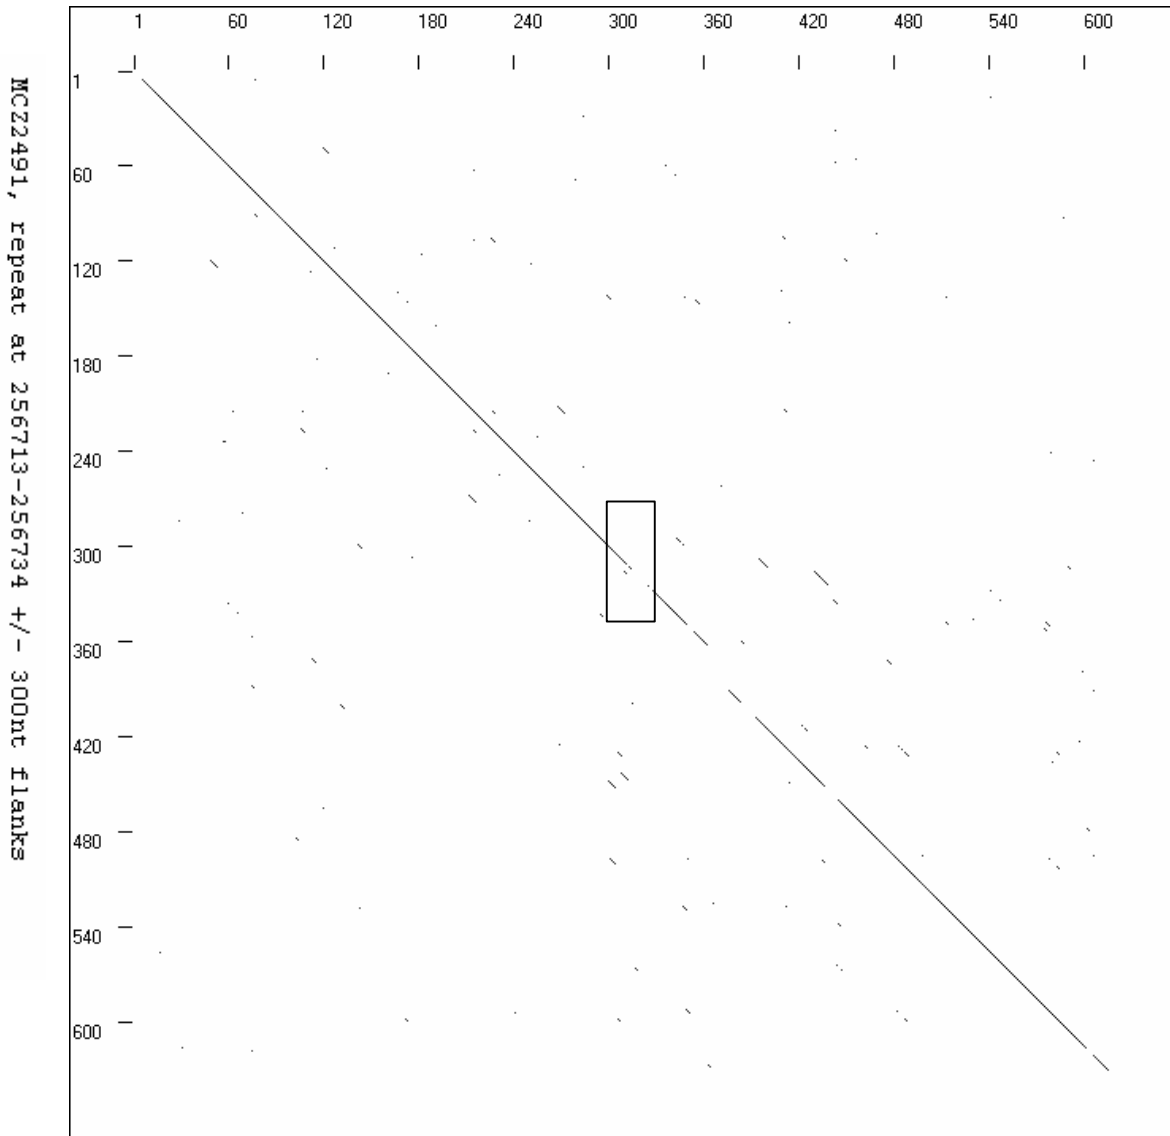

VNTRfinder: 1340997-1341015 1432907-1432925

MC58, repeat at 23260-23284 +/- 300nt flanks

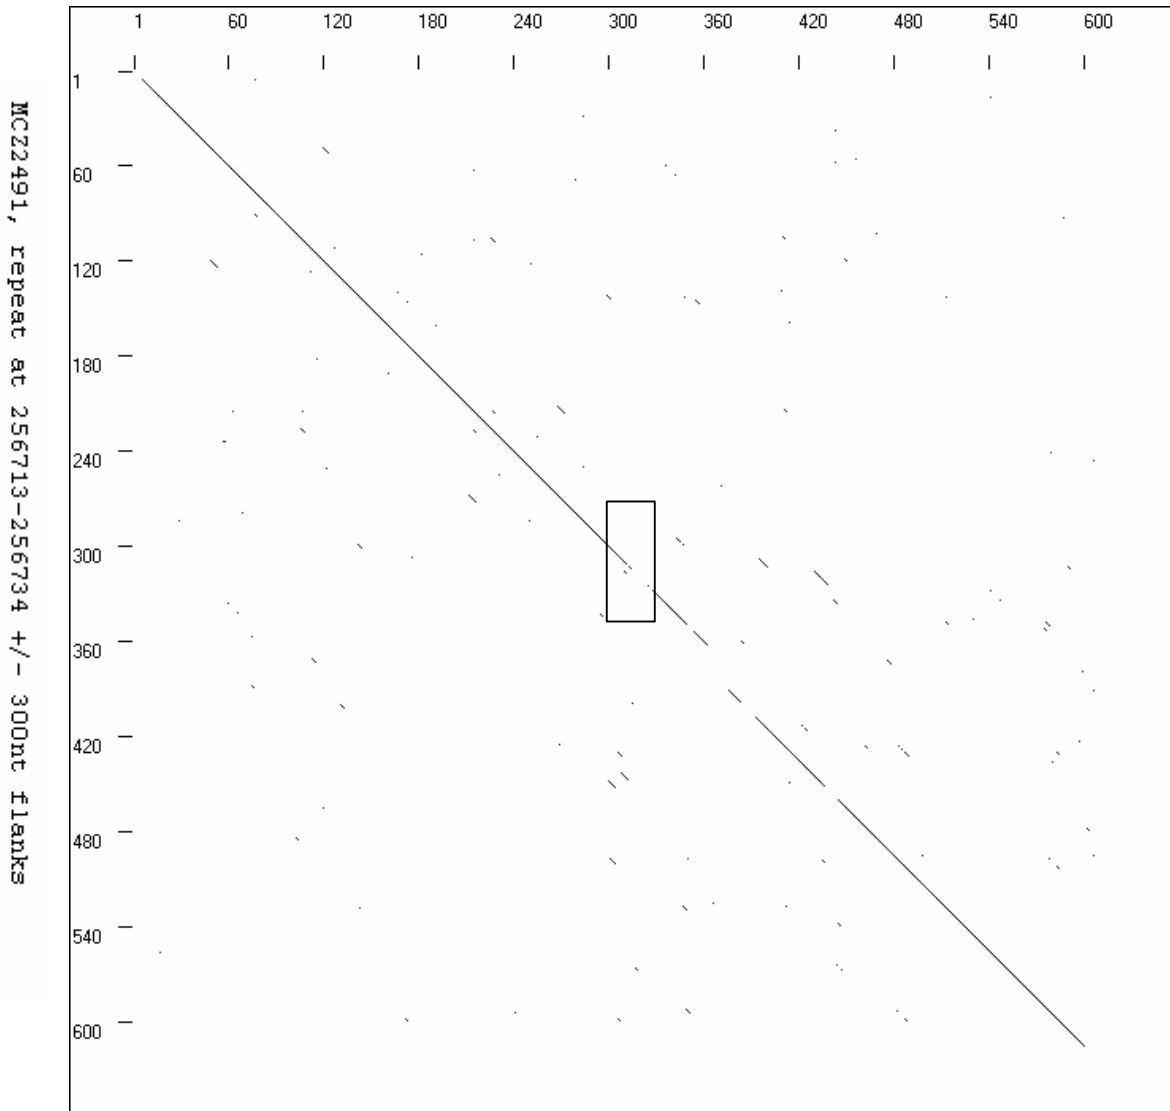

**Repeat start-stop: 1443509-1443531**  
**Unit: AGC**  
**Tandem array: AGCAGCAGCTCACACAGCAGGAG**  
**Denoeud report variant of 6**  
**VNTRfinder report variant of 0**

Denoeud: 1443509-1443531 2074644-2074628  
VNTRfinder: 1443509-1443531 2074628-2074650  
**(Same problematic sequence as before)**

**Repeat start-stop: 1452043-1452078**  
**Unit: TTTG**  
**Tandem array: TTTGCTCATTTTTTCTTTCAATGTTATTTTGTGTTG**  
**Denoeud report variant of 4**  
**VNTRfinder report variant of 0**

Denoeud: 1452043-1452078 1535314-1535353

MC58, repeat at 23260-23284 +/- 300nt flanks

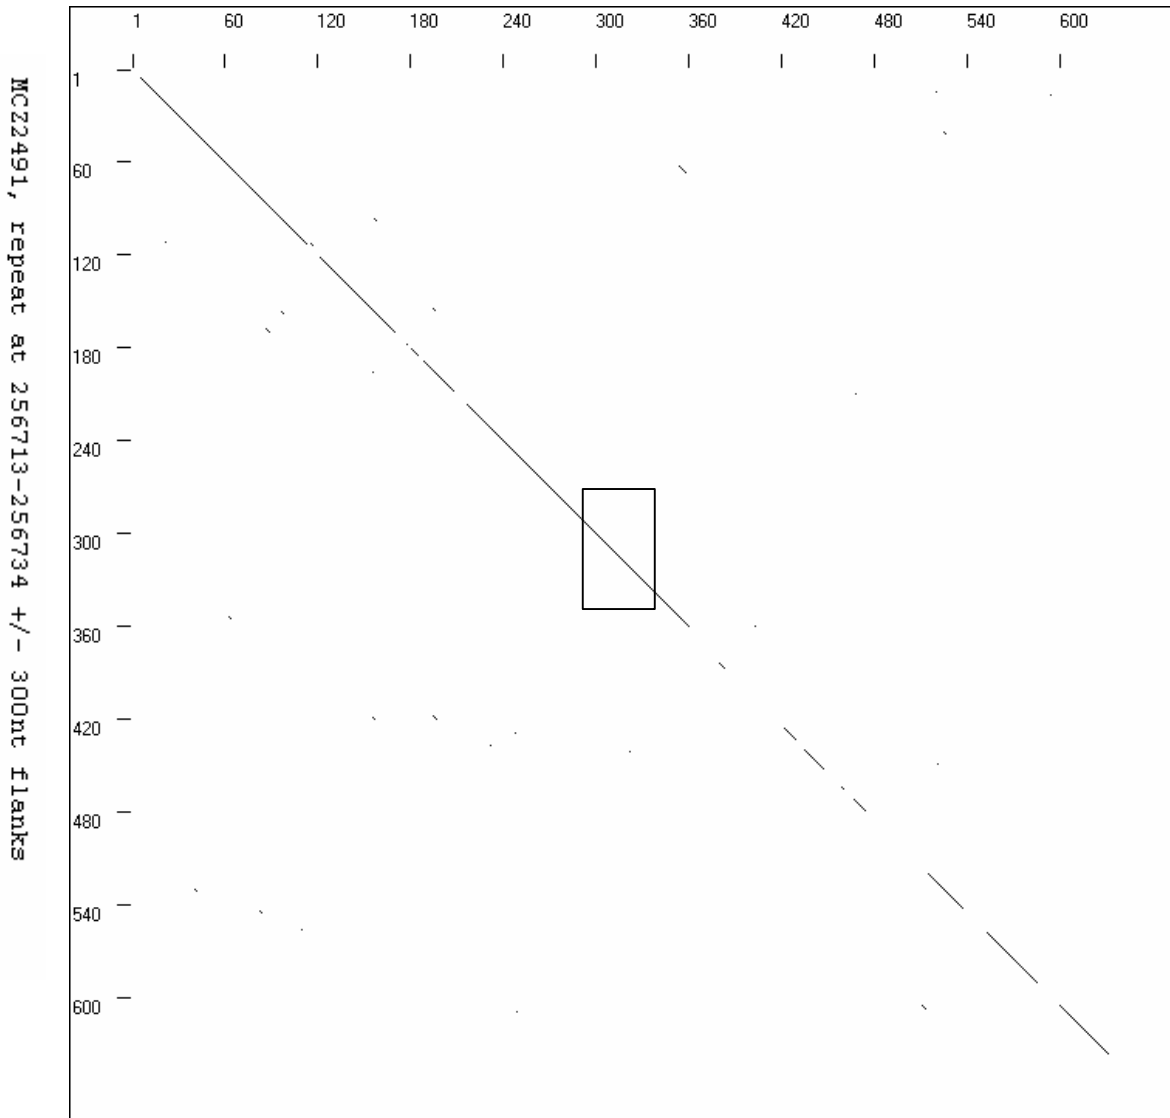

VNTRfinder: 1452043-1452078 1535314-1535349

MC58, repeat at 23260-23284 +/- 300nt flanks

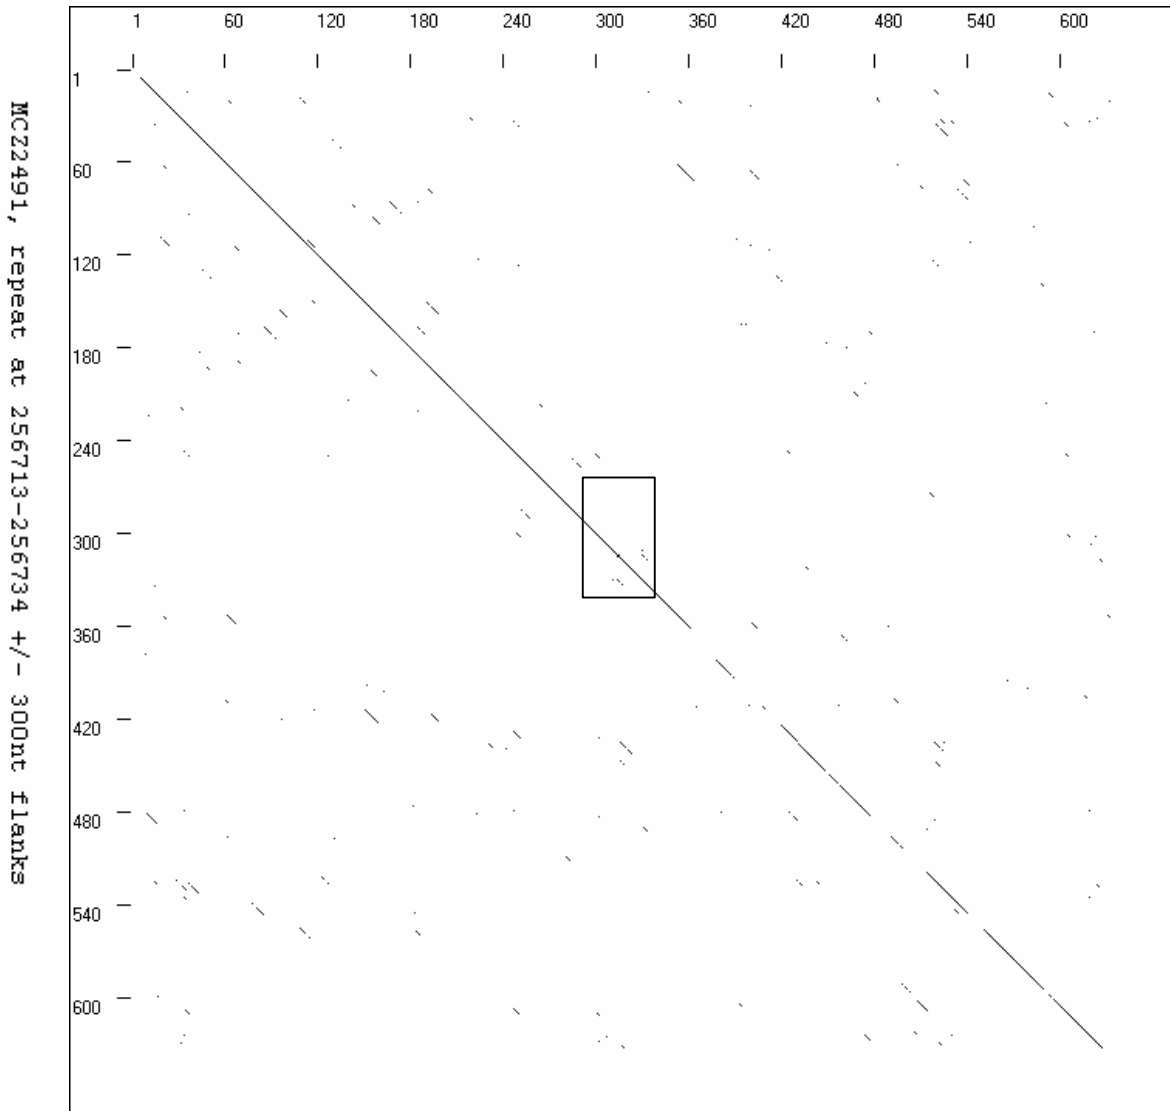

Repeat start-stop: 1487085-1487267

Unit:CCGTCATTCCCGCGAACGCGGGAATCTAGTAACCGAAAAACACAGGAATCTATCGGAAAAACAGAAA  
CCCCGA

(75mer)

Tandem array: ...

Denoeud report variant of 0

VNTRfinder report variant of 3

Denoeud: 1487085-1487267

1573652-1573834

MC58, repeat at 23260-23284 +/- 300nt flanks

MC22491, repeat at 256713-256734 +/- 300nt flanks

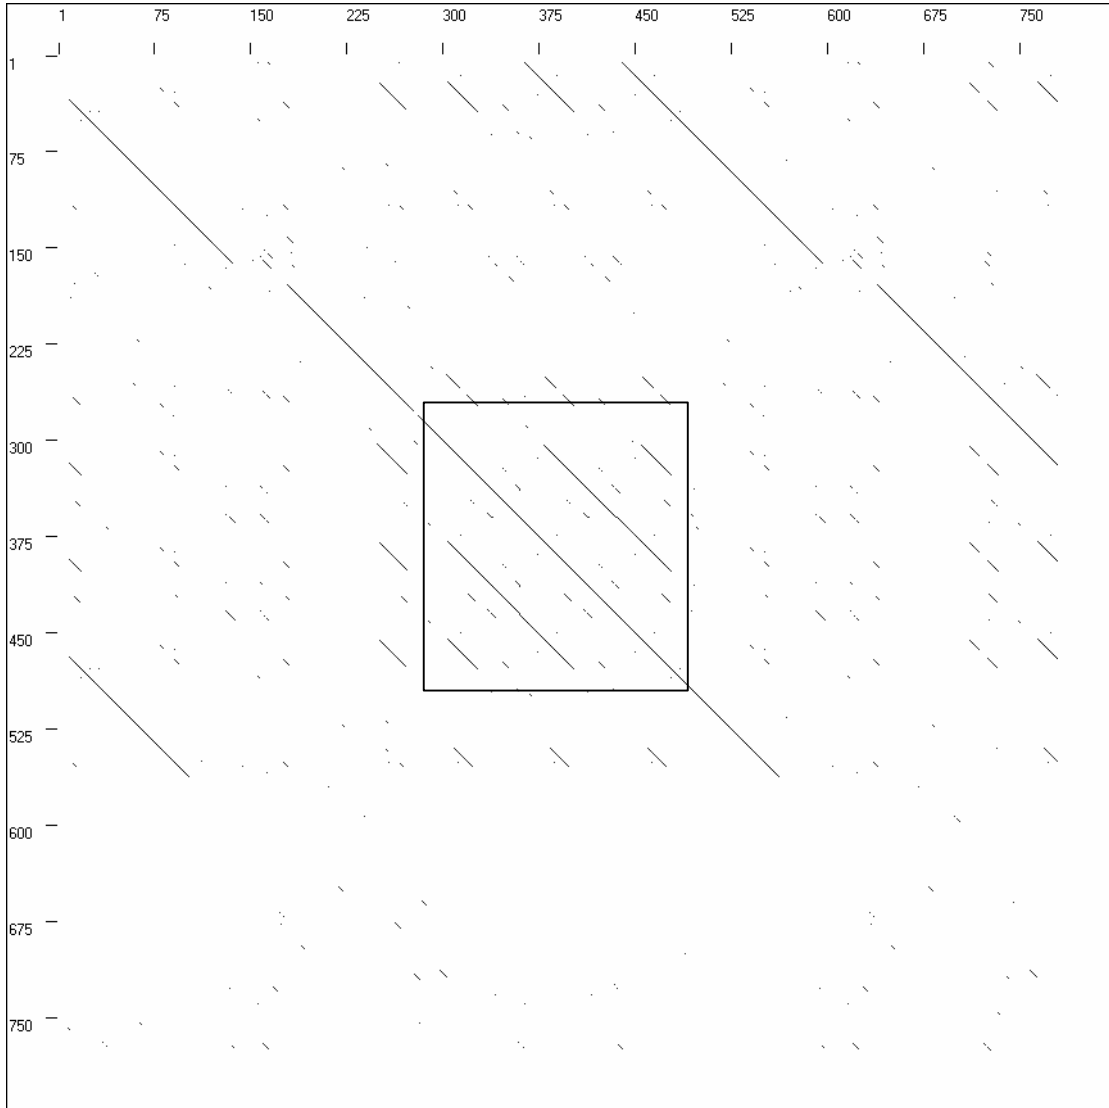

VNTRfinder: 1487085-1487267 1573215-1573400

MC58, repeat at 23260-23284 +/- 300nt flanks

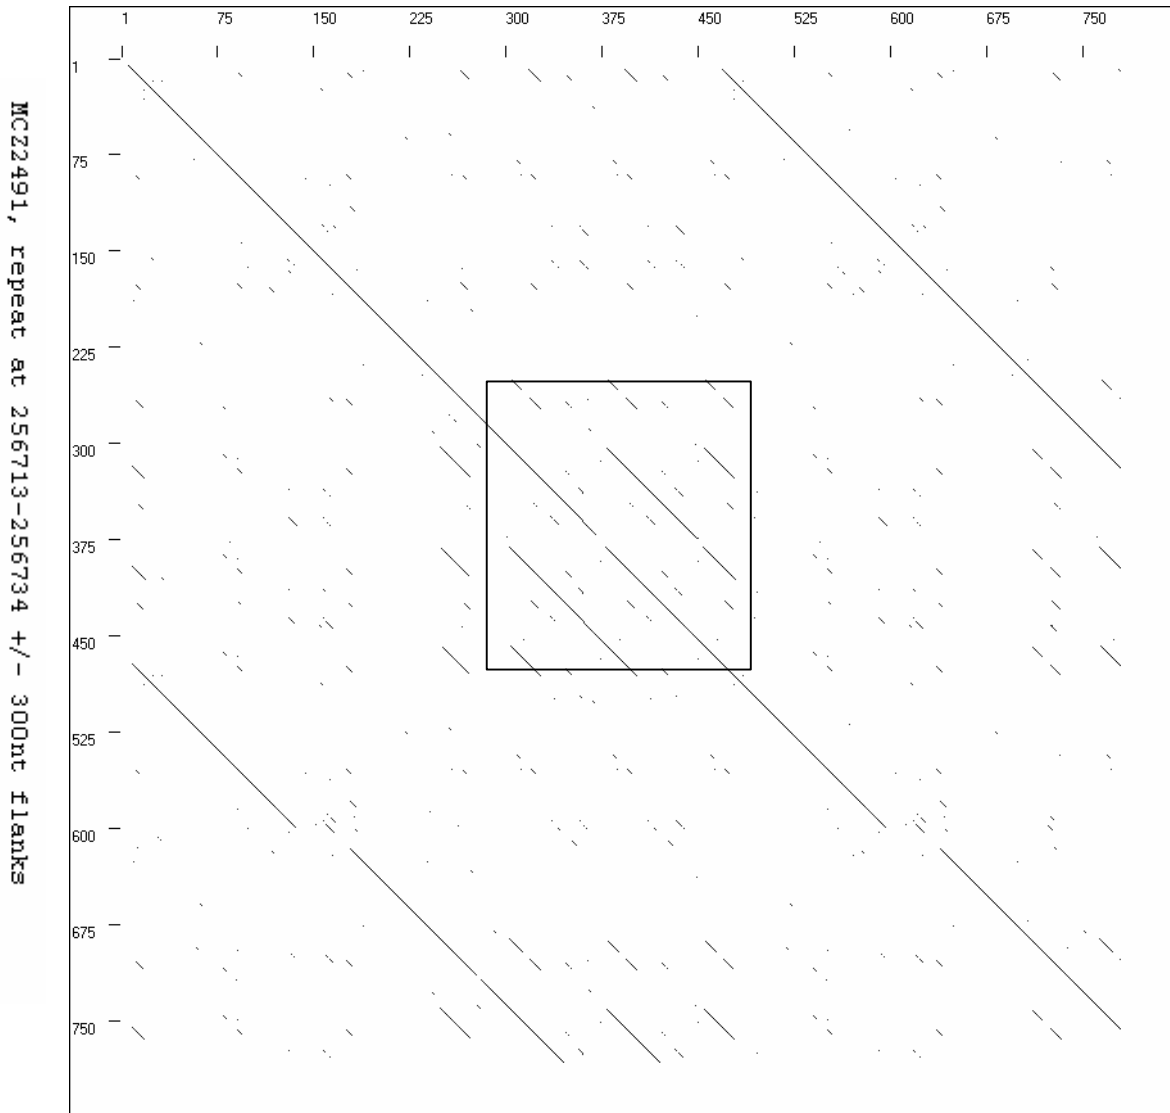

**Repeat start-stop: 1527328-1527375**

**Unit: GTTTCACCC**

**Tandem array:**

**GTTTCAGCCGGTCACAGGCGGTTTTACCTGTTTGCGCGCGATTCA**

**Denoeud report variant of 5**

**VNTRfinder report variant of 0**

Denoeud: 1527328-1527375

1612372-1612414

MC58, repeat at 23260-23284 +/- 300nt flanks

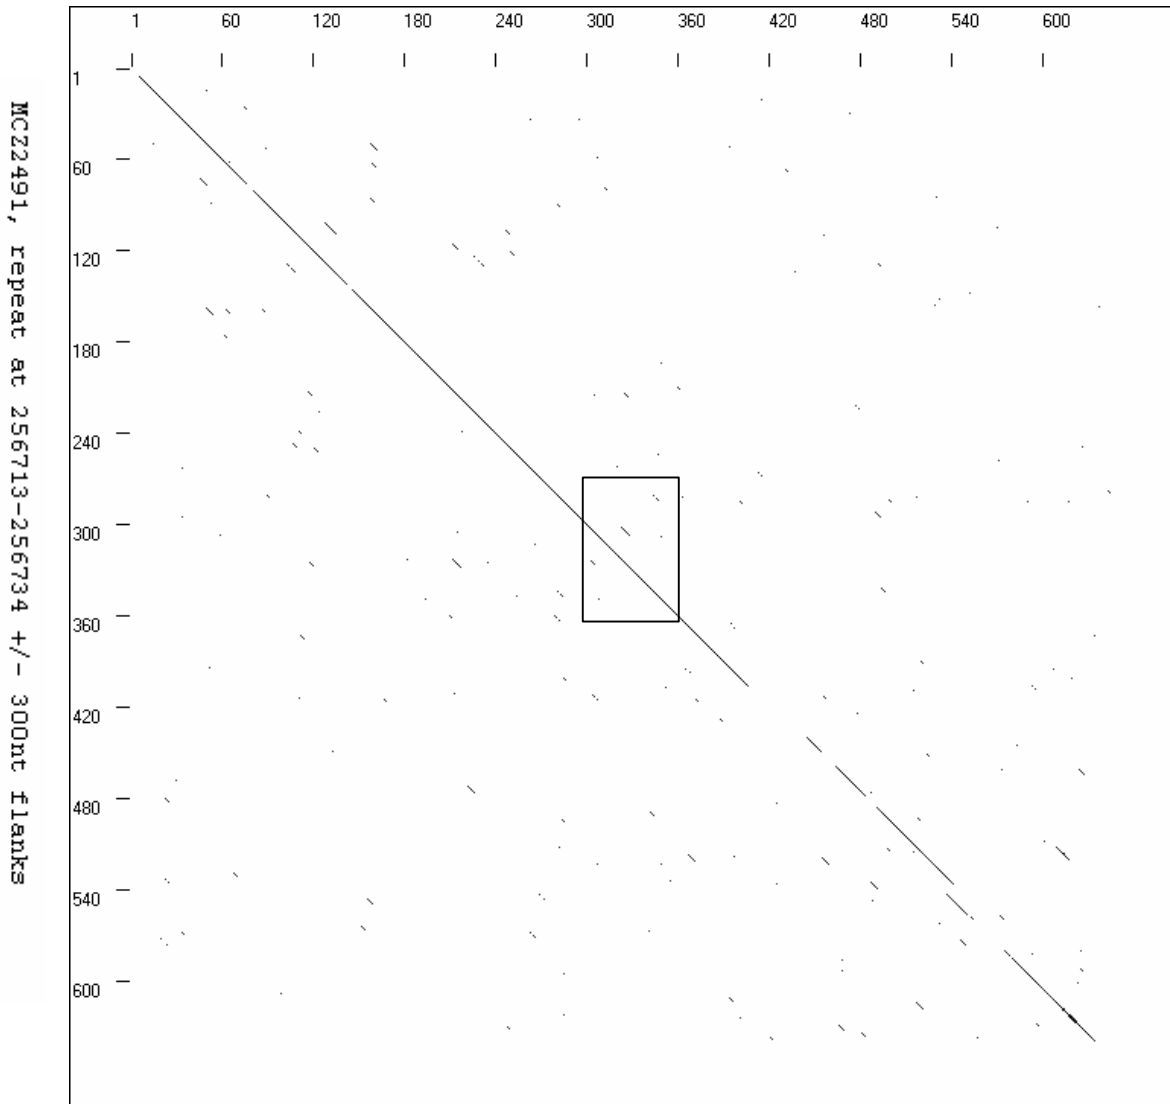

VNTRfinder: 1527328-1527375 1612372-1612419



MC58, repeat at 23260-23284 +/- 300nt flanks

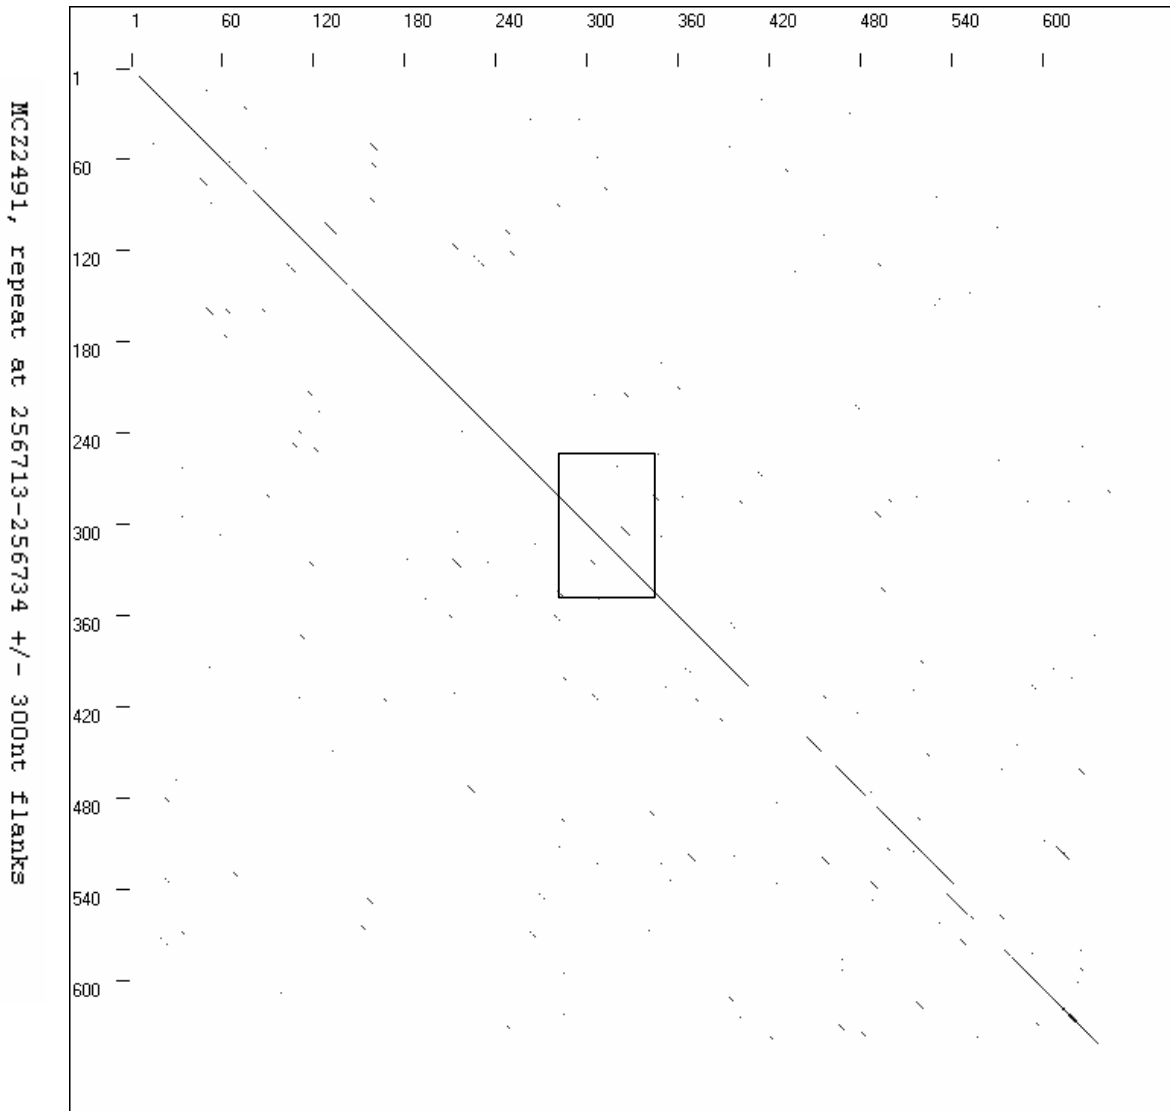

**Repeat start-stop: 1604964-1605008**

**Unit: AATCCCGATGCA**

**Tandem array:**

**AATCCCGAACCCGACCCCGATTGAATCCCGATGCAAATCCCGAT**

**Denoeud report variant of 18**

**VNTRfinder report variant of 0**

Denoeud: 1604964-1605008 1741676-1741702

MC58, repeat at 23260-23284 +/- 300nt flanks

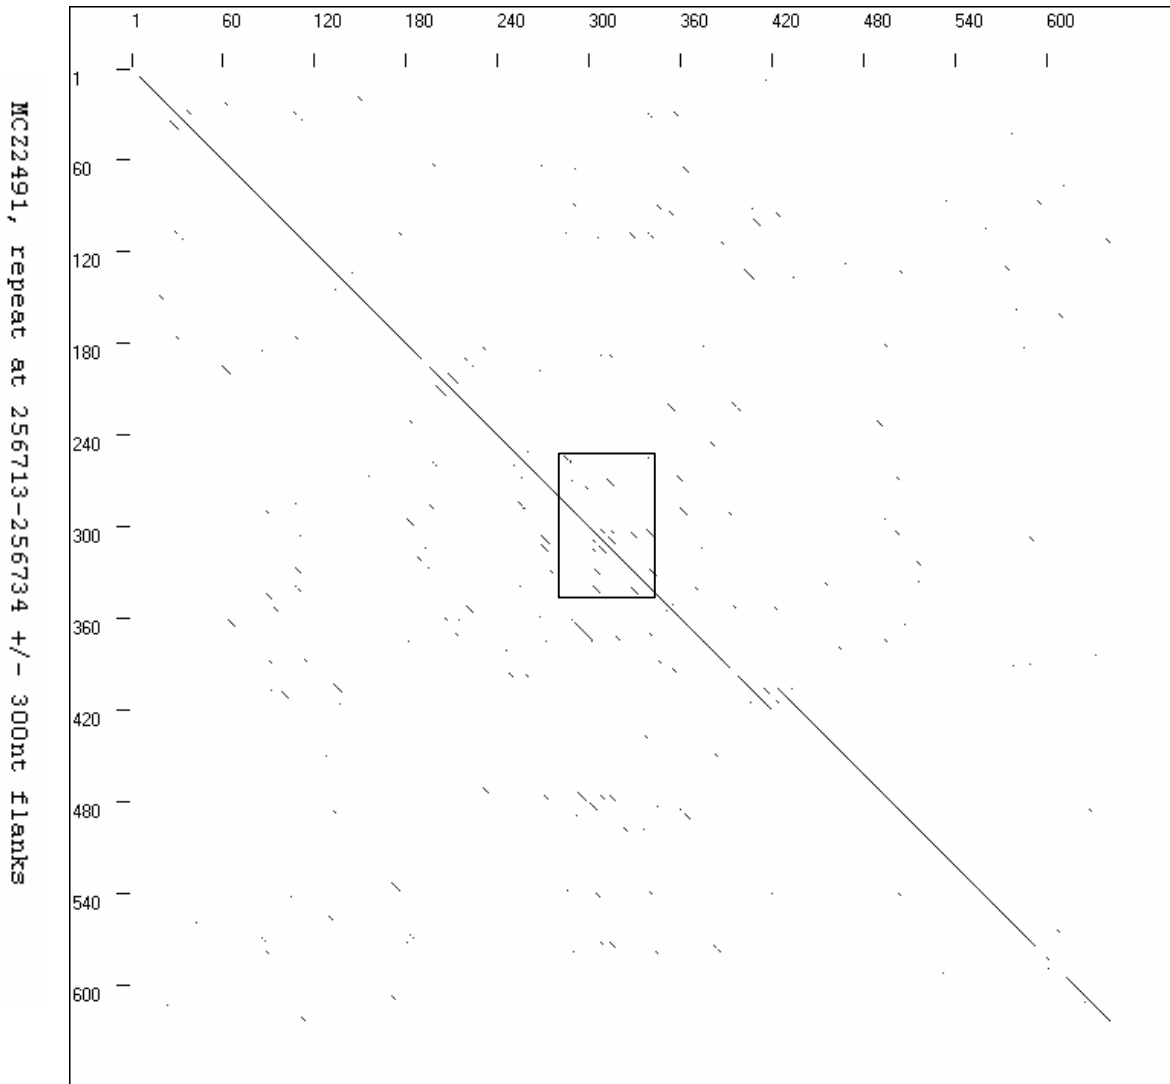

VNTRfinder: 1604964-1605008 1741676-1741720

MC58, repeat at 23260-23284 +/- 300nt flanks

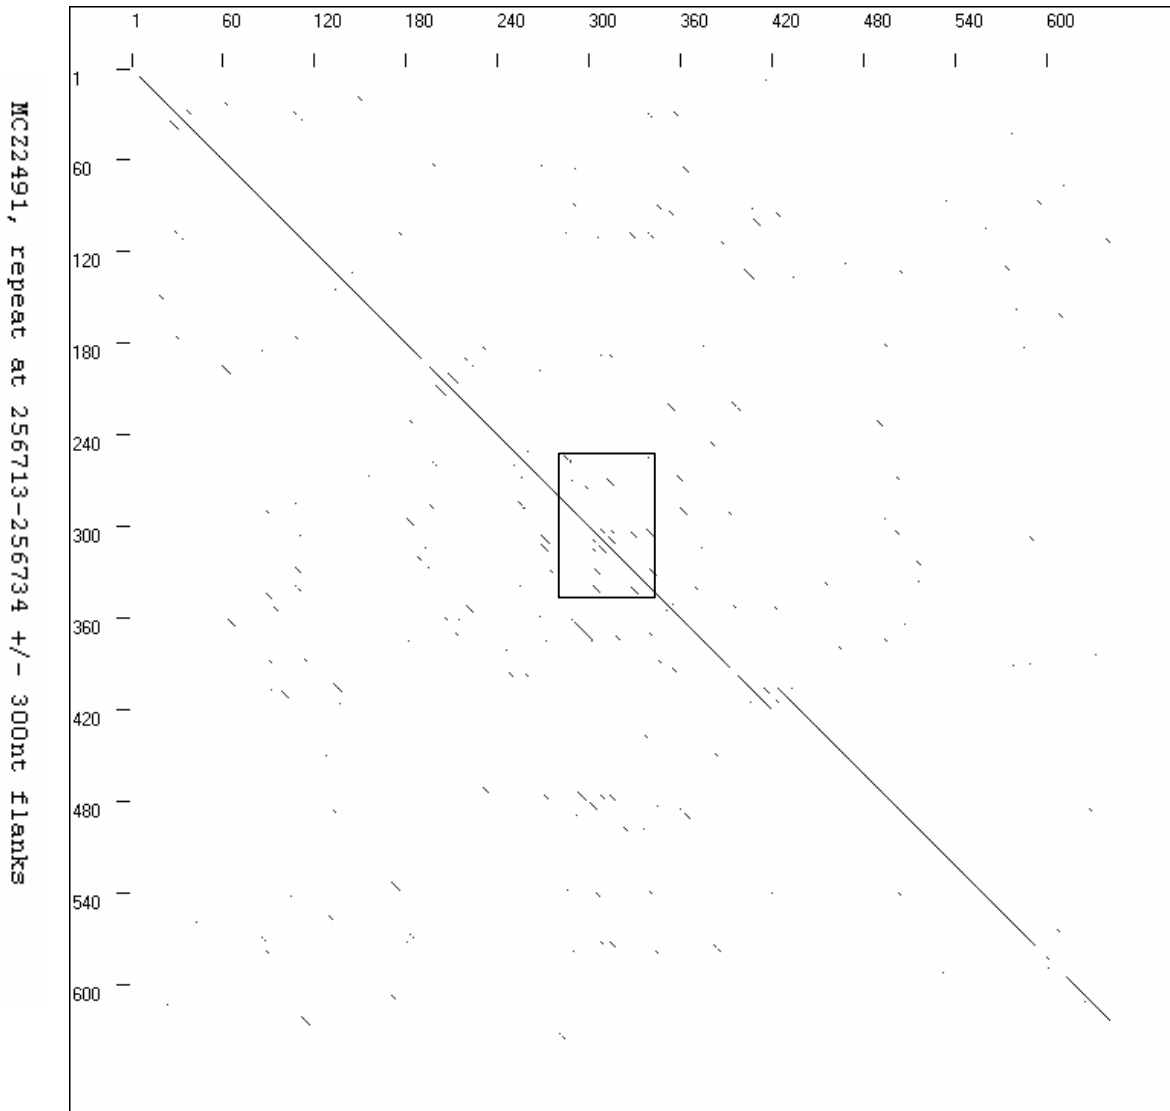

**Repeat start-stop: 1694228-1694275**

**Unit: CGAATCGGGATT**

**Tandem array:**

**CGTATCGGGATTTGCATCGGGATTCAAATCGGGGTCGGGTTCTCGGGATT**

**Denoeud report variant of 18**

**VNTRfinder report variant of 0**

Denoeud: 1694228-1694275 1741705-1741676

MC58, repeat at 23260-23284 +/- 300nt flanks

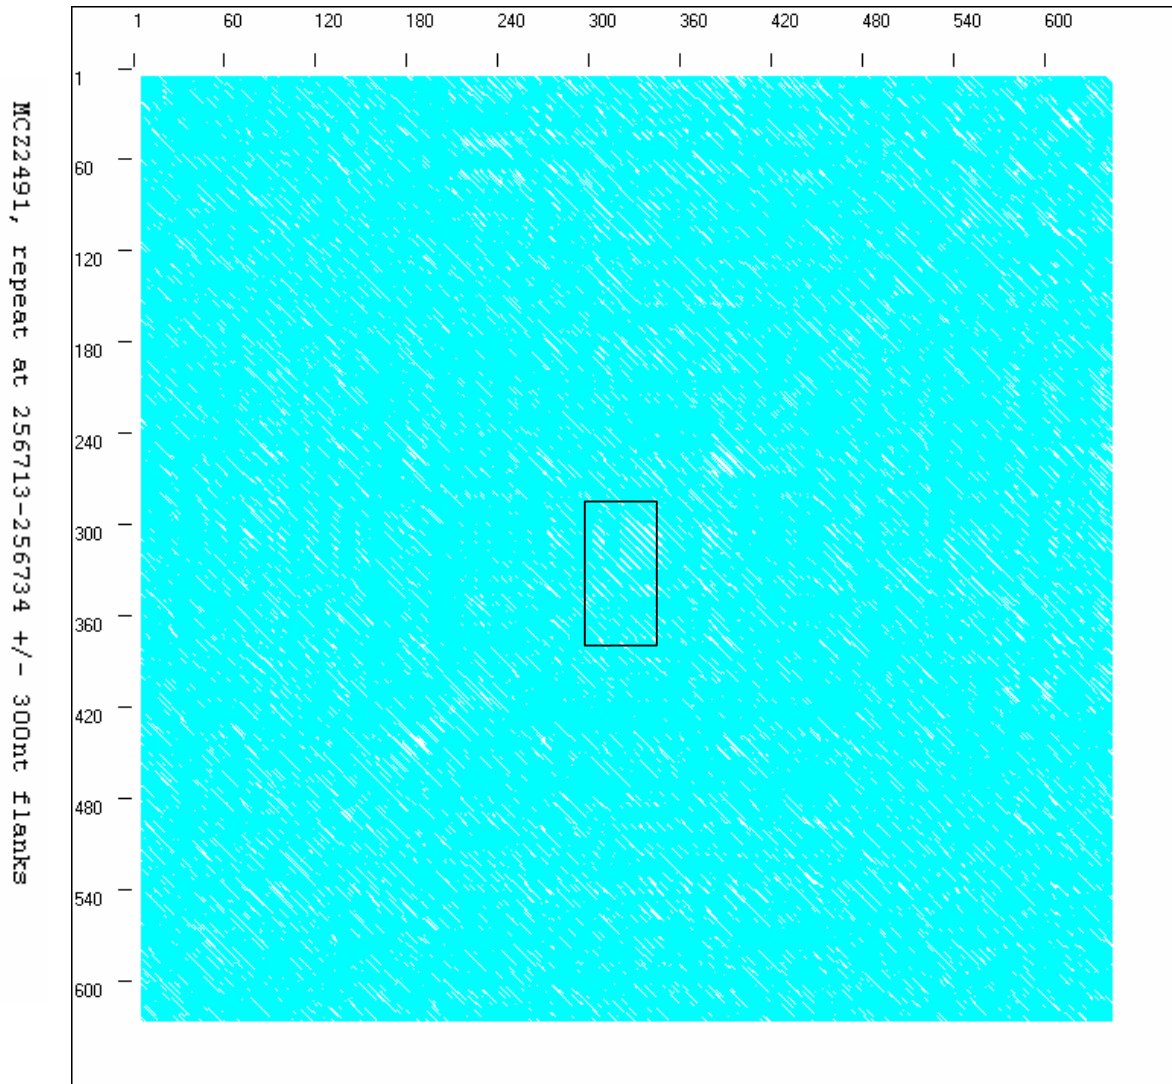

VNTRfinder: 1694228-1694275 1741676-1741723

MC58, repeat at 23260-23284 +/- 300nt flanks

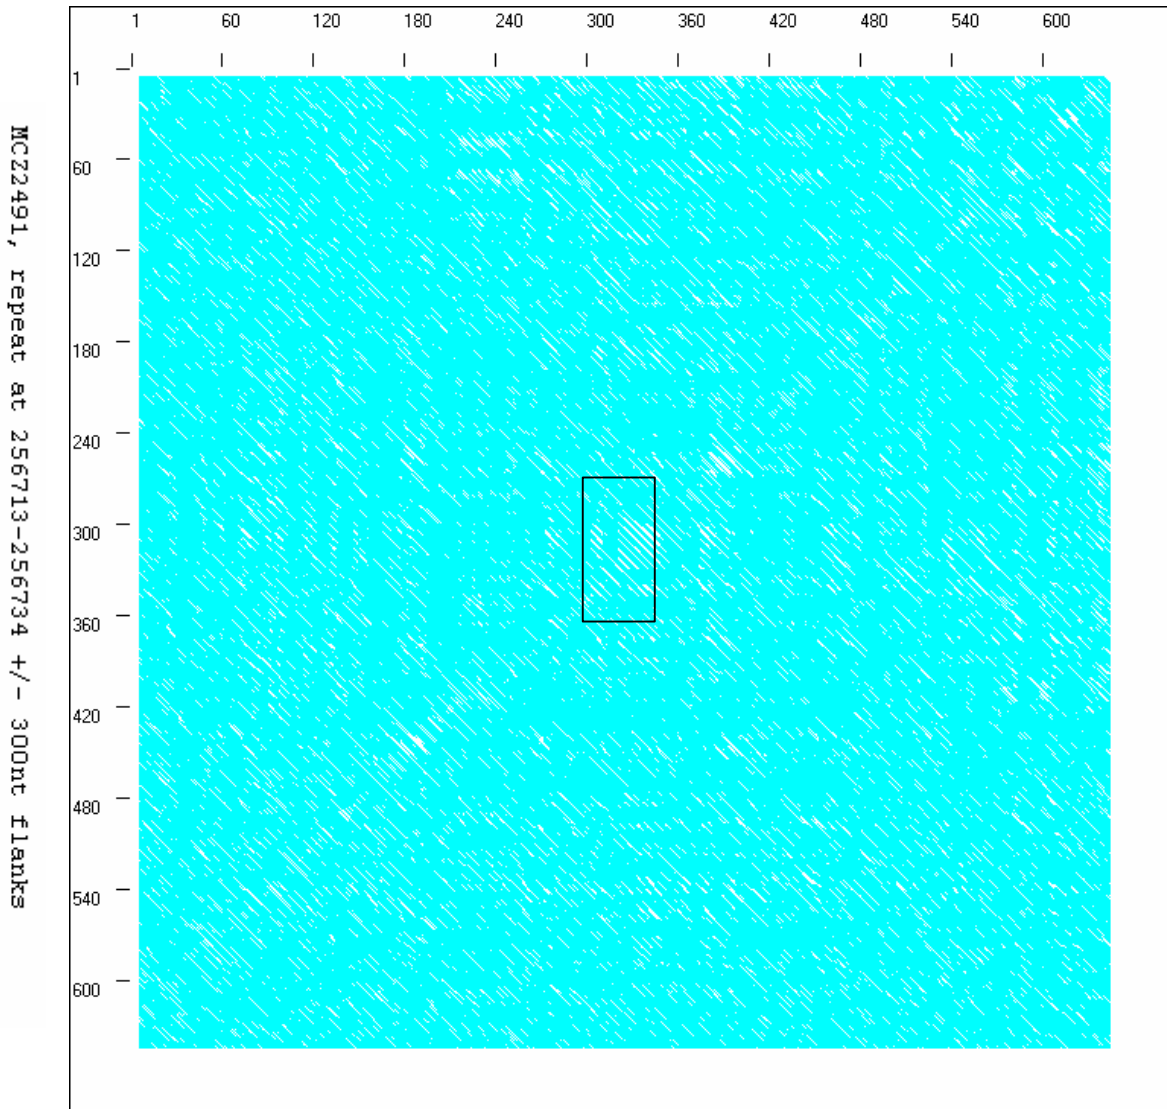

**Repeat start-stop: 1822610-1822663**  
**Unit: CCGCCGTCACATTCAGTGC**  
**Tandem array:**  
**CCGCCGTGACATTCATGCCCGCCGTCAGATTCAGTGCCTTTGCCGTC AATATTC A**  
**Denoeud report variant of 134**  
**VNTRfinder report variant of 0**

Denoeud: 1822610-1822663 1934569-1934756

MC58, repeat at 23260-23284 +/- 300nt flanks

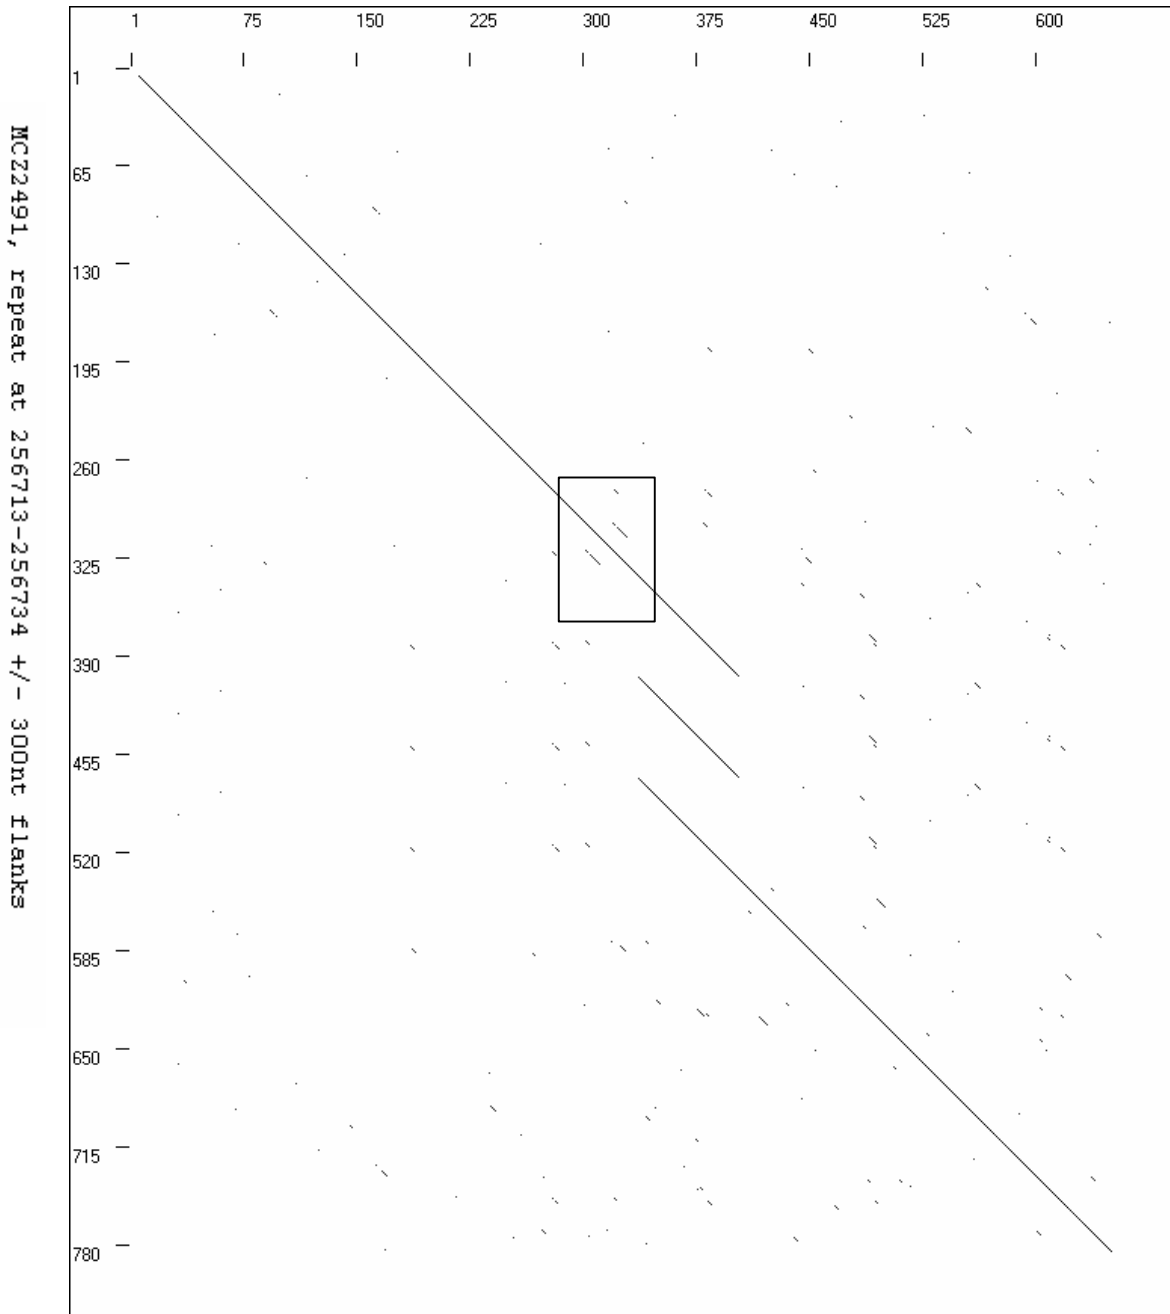

VNTRfinder: 1822610-1822663 1934569-1934622

MC58, repeat at 23260-23284 +/- 300nt flanks

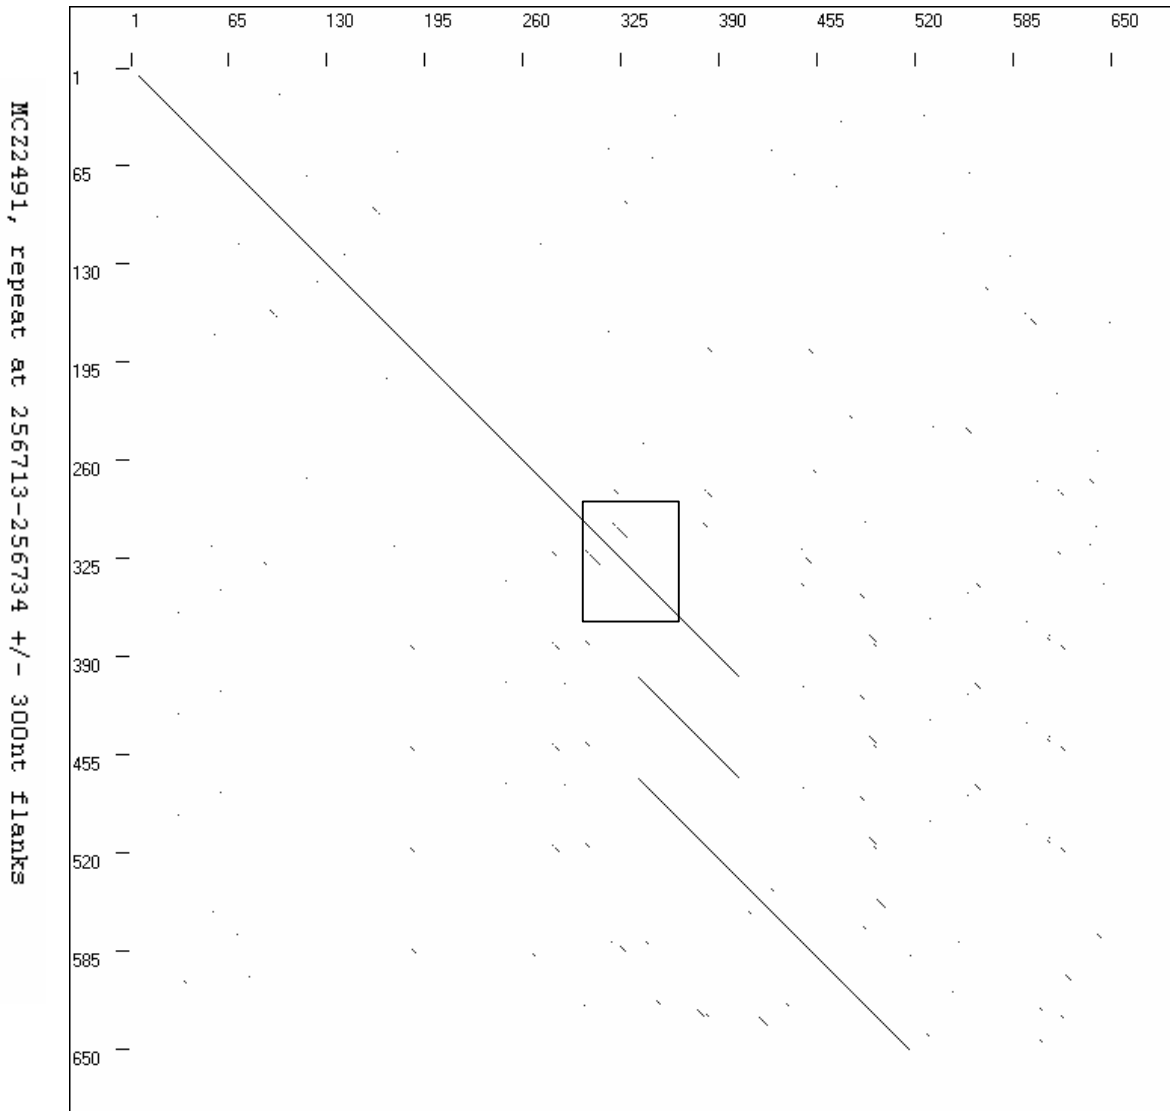

**Repeat start-stop: 1975357-1975387**  
**Unit: CTGCCTTCTG**  
**Tandem array: CTGCCTTCTGCTGCCTTTCTCTGACCACTGC**  
**Denoeud report variant of 186**  
**VNTRfinder report variant of 0**

Denoeud: 1975357-1975387 558771-558555

MC58, repeat at 23260-23284 +/- 300nt flanks

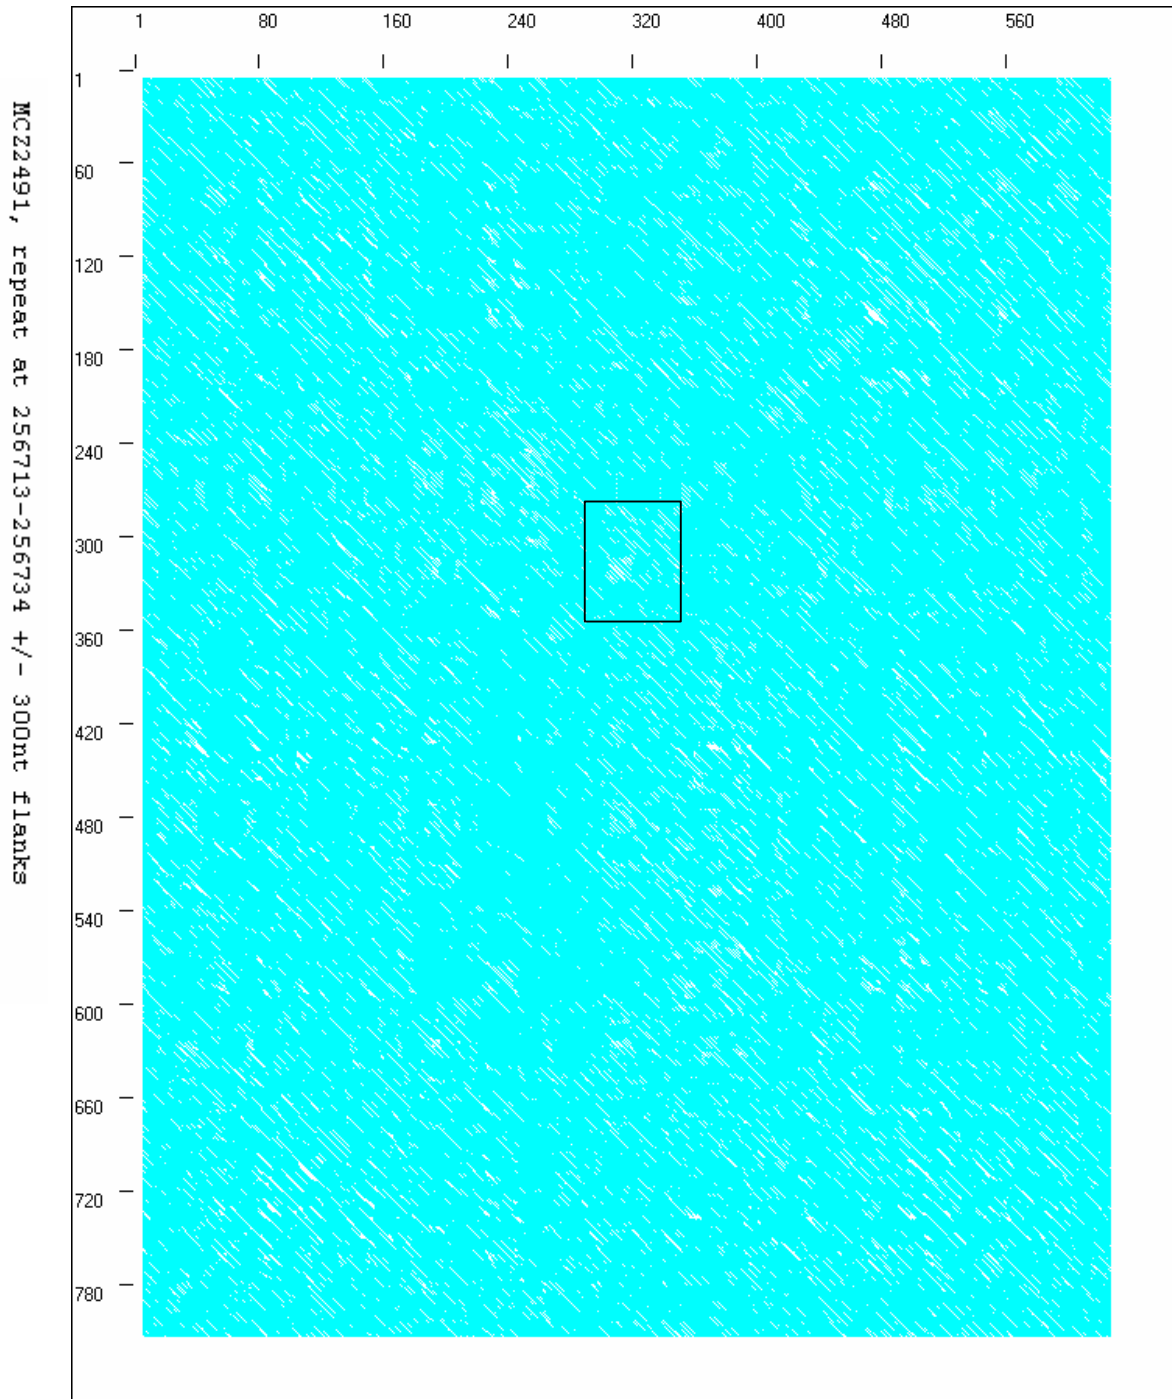

VNTRfinder: 1975357-1975387 558555-558585



MC58, repeat at 23260-23284 +/- 300nt flanks

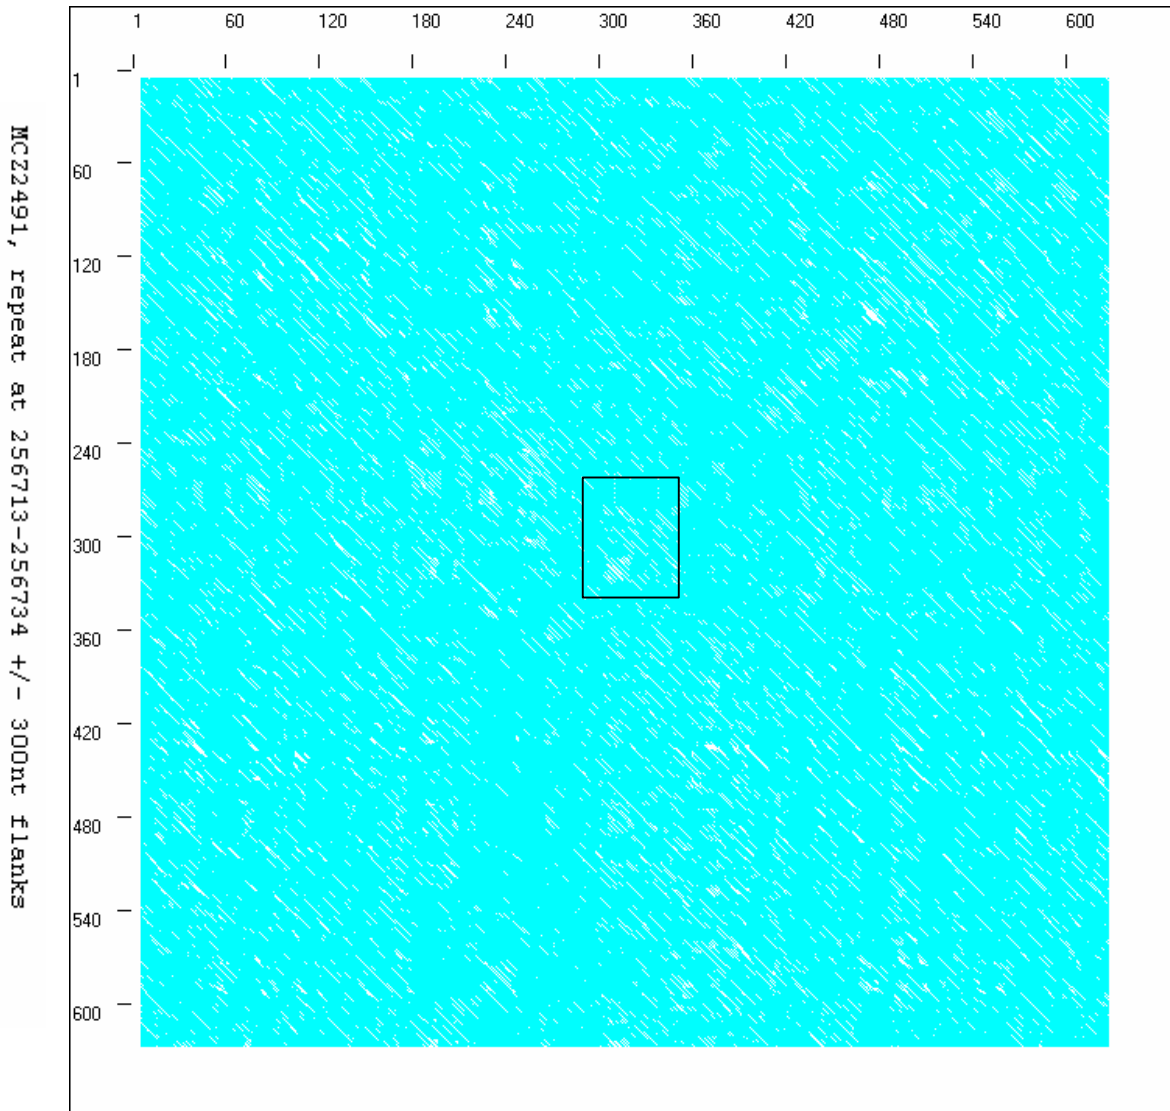

**Repeat start-stop: 1985578-1985598**  
**Unit: GGGAGA**  
**Tandem array: GGGAGAGGGTTAGGGAGAGGG**  
**Denoed report variant of 12**  
**VNTRfinder report variant of 0**

Deneoud: 1985578-1985598 547879-547871

MC58, repeat at 23260-23284 +/- 300nt flanks

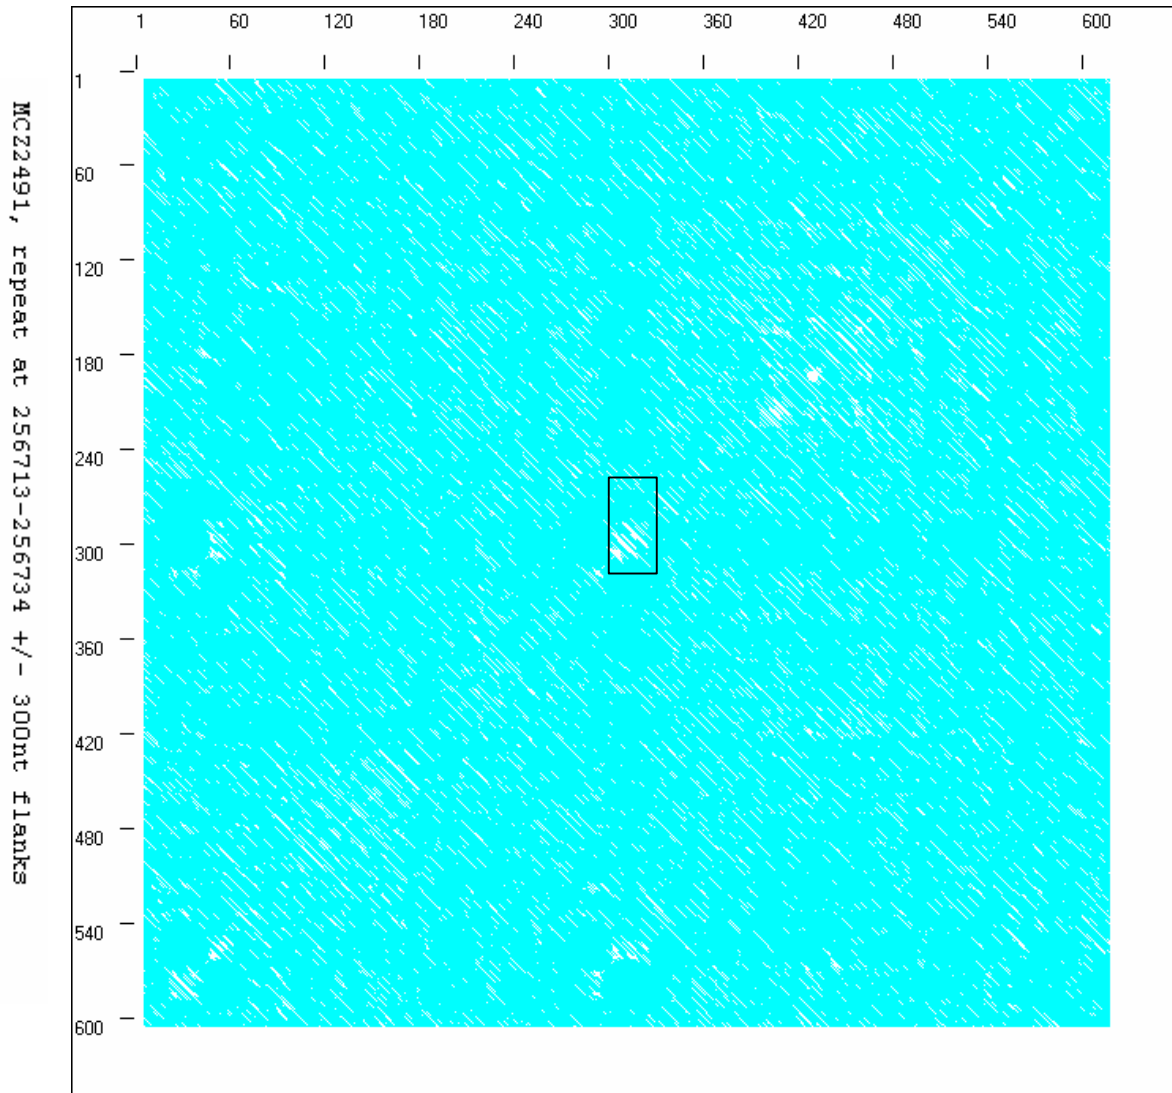

VNTRfinder: 1985578-1985598 547859-547879

MC58, repeat at 23260-23284 +/- 300nt flanks

MC22491, repeat at 256713-256734 +/- 300nt flanks

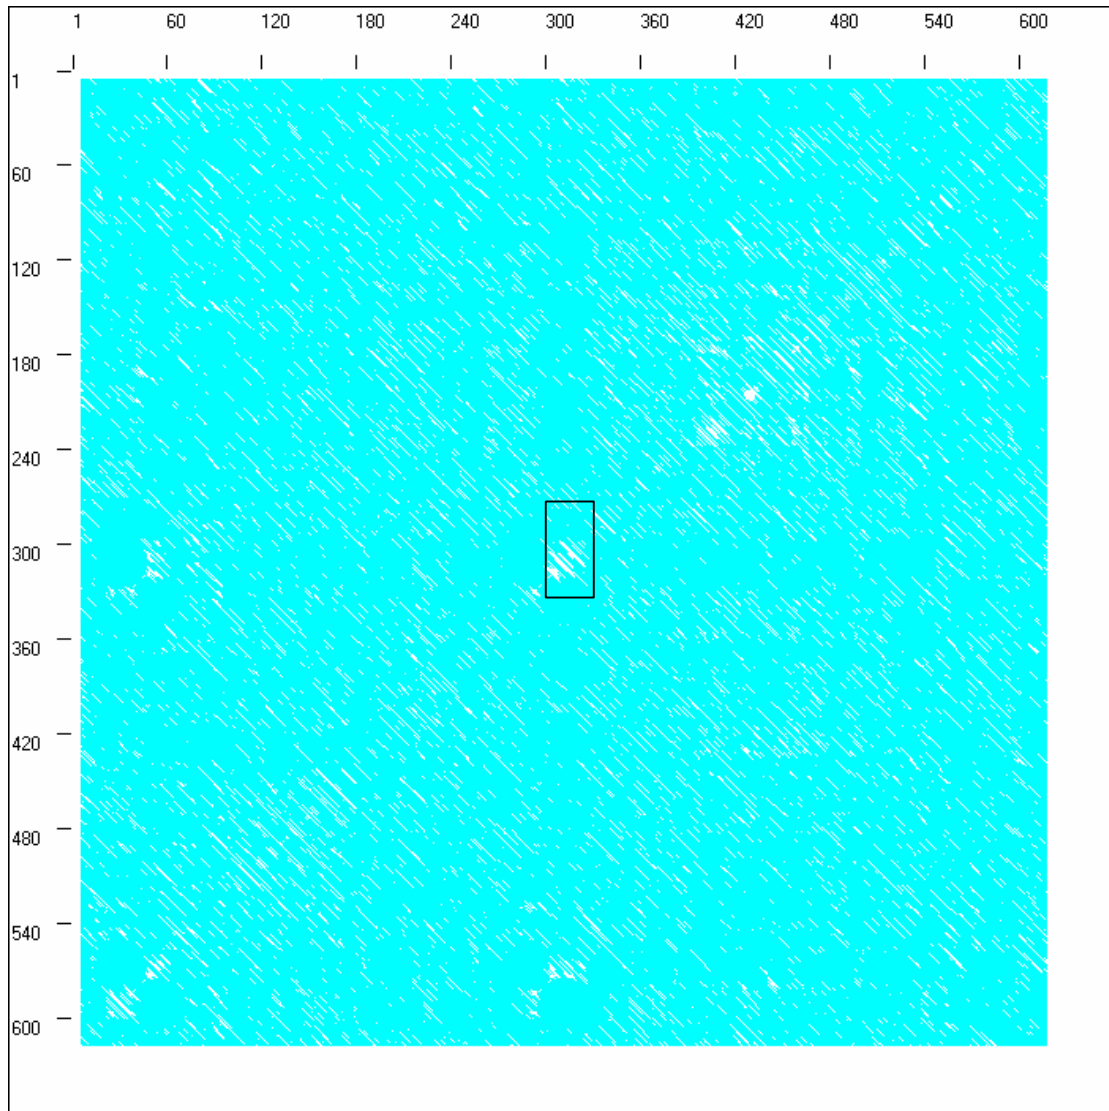

Supplement: 1471-2164-7-290-S1.pdf [file 1471-2164-7-290-S1.pdf]
